# Supplementary material for: Assembly and Comparative Analysis of Chromosomal Mitochondrial Genomes in Multiple Medicago Species
Source: Research Square preprint supplement (doi:10.21203/rs.3.rs-7230374/v1), 2025-08-12
Supplement: Supplementary file 1 [file 3e29200cc7e048125ceafd61.xlsx]

## Sheet: Table S1
Table S1. Statistical Summary of Third-Generation HiFi Sequencing Data in the six Medicago species.
Sample name	Hifi reads number	Total Bases(Gb)
Medicago lupulina	1501553	32.84
Medicago falcata	1324555	28.25
Medicago minima	1036548	21.04
Medicago edgeworthii	1179467	24.11
Medicago platycarpos	1725536	34.57
Medicago sativa	2393168	42.98

## Sheet: Table S2
Table S2. Summary of species information and sequence sources used for phylogenetic tree construction
Sample name	Sequence source
Medicago lupulina	This study
Medicago falcata	This study
Medicago minima	This study
Medicago edgeworthii	This study
Medicago platycarpos	This study
Medicago sativa	This study
Medicago truncatula	NC_029641.1
Medicago arabica	DQ662798.1
Vicia faba	KC189947.1
Pisum sativum	PP657342.1
Trifolium grandiflorum	NC_048501.1
Trifolium aureum	NC_048502.1
Trifolium meduseum	NC_048500.1
Astragalus membranaceus	PP988562.1
Glycyrrhiza glabra	MW448466.1
Glycyrrhiza uralensis	NC_053919.1
Lotus corniculatus	PP706441.1
Lotus japonicus	NC_016743.2
Vigna radiata	NC_015121.1
Phaseolus vulgaris	NC_045135.1
Glycine max	NC_020455.1
Lupinus albus	MW448461.1
Senna occidentalis	NC_038221.1
Delonix regia	NC_086846.1
Suriana maritima	NC_038221.1

## Sheet: Table S3
Table S3. Summary of basic annotation information for the mitochondrial genomes of eight Medicago species
Sample name	GC%	Length	protein-coding genes	tRNA genes	rRNA genes	Total genes
Medicago lupulina	45.36	292,846 bp	34(33)	20(17)	3(3)	57(53)
Medicago falcata	45.34	356,577 bp	41(33)	24(16)	5(3)	74(52)
Medicago minima	45.29	281,240 bp	34(33)	18(16)	3(3)	55(52)
Medicago edgeworthii	45.58	283,861 bp	33(33)	19(17)	3(3)	55(53)
Medicago platycarpos	45	348,112 bp	33(33)	20(17)	3(3)	56(53)
Medicago sativa	45.44	297,911 bp	34(33)	20(17)	3(3)	57(53)
Medicago truncatula	45.39	271,618 bp	35(34)	18(16)	3(3)	56(53)
Medicago arabica	44.92	324,468 bp	36(33)	19(17)	3(3)	58(53)

## Sheet: Table S4
Table S4. Genetic composition of mitochondrial genome of eight Medicago species
Sample name	Group of genes
	ATPase	Cytochrome c biogenesis	Apocytochrome b	Cytochrome c oxidase	Maturase R	Transport membrane protein	NADH dehydrogenase	Succinate dehydrogenase	Ribosomal proteins (LSU)	Ribosomal proteins (SSU)	Ribosomal RNA	Transfer RNAs
Medicago lupulina	atp1, atp4, atp6, atp8, atp9	ccmB, ccmC, ccmFC(1), ccmFN	cob	cox1, cox2, cox3	matR	mttB	nad1(4), nad2(4), nad3, nad4(3), nad4L nad5(4), nad6, nad7(4), nad9	sdh4*	rpl16, rpl5	rps10(1), rps12, rps14, rps3(1), rps4, rps7	rrn18, rrn26, rrn5	trnF-GAA*, trnM-CAU*, trnQ-UUG*(1), trnS-GGA(1) trnV-CAC(1), trnC-GCA, trnD-GUC, trnE-UUC trnG-GCC, trnH-GUG, trnK-UUU, trnfM-CAU trnI-CAU, trnN-GUU, trnP-UGG, trnW-CCA trnY-GUA
Medicago falcata	atp1*, atp4*, atp6, atp8, atp9	ccmB*, ccmC, ccmFC(1), ccmFN**	cob	cox1, cox2, cox3*	matR	mttB	nad1(4), nad2(4), nad3, nad4(3), nad4L* nad5(4), nad6, nad7(4), nad9	sdh4*	rpl16, rpl5	rps10(1), rps12, rps14, rps3(1), rps4, rps7	rrn18, rrn26**, rrn5	trnF-GAA*, trnQ-UUG*(1), trnS-GGA*(1)(1) trnC-GCA*, trnD-GUC, trnE-UUC, trnG-GCC trnH-GUG, trnK-UUU, trnfM-CAU**, trnI-CAU trnM-CAU, trnN-GUU*, trnP-UGG, trnW-CCA trnY-GUA*
Medicago minima	atp1, atp4, atp6, atp8, atp9	ccmB, ccmC, ccmFC(1), ccmFN	cob	cox1, cox2, cox3	matR	mttB	nad1(4), nad2(4), nad3, nad4(3), nad4L nad5(4), nad6, nad7(4), nad9	sdh4*	rpl16, rpl5	rps10(1), rps12, rps14, rps3(1), rps4, rps7	rrn18, rrn26, rrn5	trnF-GAA*, trnQ-UUG*(1), trnV-CAC(1) trnC-GCA, trnD-GUC, trnE-UUC, trnG-GCC trnH-GUG, trnK-UUU, trnI-CAU, trnfM-CAU trnM-CAU, trnN-GUU, trnP-UGG, trnW-CCA trnY-GUA
Medicago edgeworthii	atp1, atp4, atp6, atp8, atp9	ccmB, ccmC, ccmFC(1), ccmFN	cob	cox1, cox2, cox3	matR	mttB	nad1(4), nad2(4), nad3, nad4(3), nad4L nad5(4), nad6, nad7(4), nad9	sdh4	rpl16, rpl5	rps10(1), rps12, rps14, rps3(1), rps4, rps7	rrn18, rrn26, rrn5	trnF-GAA*, trnQ-UUG*(1), trnS-GGA(1) trnV-CAC(1), trnC-GCA, trnD-GUC, trnE-UUC trnG-GCC, trnH-GUG, trnK-UUU, trnfM-CAU trnM-CAU, trnI-CAU, trnN-GUU, trnP-UGG trnW-CCA, trnY-GUA
Medicago platycarpo	atp1, atp4, atp6, atp8, atp9	ccmB, ccmC, ccmFC(1), ccmFN	cob	cox1, cox2, cox3	matR	mttB	nad1(4), nad2(4), nad3, nad4(3), nad4L nad5(4), nad6, nad7(4), nad9	sdh4	rpl16, rpl5	rps10(1), rps12, rps14, rps3(1), rps4, rps7	rrn18, rrn26, rrn5	trnF-GAA*, trnQ-UUG*(1), trnS-GGA(1) trnV-CAC(1), trnC-GCA, trnD-GUC, trnE-UUC trnG-GCC, trnH-GUG, trnK-UUU, trnI-CAU trnfM-CAU*, trnM-CAU, trnN-GUU, trnP-UGG trnW-CCA, trnY-GUA
Medicago sativa	atp1, atp4, atp6, atp8, atp9	ccmB, ccmC, ccmFC(1), ccmFN	cob	cox1, cox2, cox3	matR	mttB	nad1(4), nad2(4), nad3, nad4(3), nad4L nad5(4), nad6, nad7(4), nad9	sdh4*	rpl16, rpl5	rps10(1), rps12, rps14, rps3(1), rps4, rps7	rrn18, rrn26, rrn5	trnF-GAA*, trnQ-UUG*(1), trnS-GGA(1) trnV-CAC(1), trnC-GCA, trnD-GUC, trnE-UUC trnG-GCC, trnH-GUG, trnK-UUU, trnfM-CAU* trnI-CAU, trnM-CAU, trnN-GUU, trnP-UGG trnW-CCA, trnY-GUA
Medicago truncatula	atp1, atp4, atp6, atp8, atp9	ccmB, ccmC, ccmFC(1), ccmFN	cob	cox1, cox2, cox3	matR	mttB	nad1(4), nad2(4), nad3, nad4(3), nad4L nad5(4), nad6, nad7(4), nad9	sdh4*	rpl16, rpl5	rps1, rps10(1), rps12, rps14, rps3(1), rps4, rps7	rrn18, rrn26, rrn5	trnF-GAA*, trnQ-UUG*(1), trnS-GGA(1) trnC-GCA, trnD-GUC, trnE-UUC, trnG-GCC trnH-GUG, trnK-UUU, trnfM-CAU, trnM-CAU trnI-CAU, trnN-GUU, trnP-UGG, trnW-CCA trnY-GUA
Medicago arabica	atp1*, atp4*, atp6, atp8, atp9	ccmB, ccmC, ccmFC(1), ccmFN	cob	cox1, cox2, cox3	matR	mttB	nad1(4), nad2(4), nad3, nad4(3), nad4L* nad5(4), nad6, nad7(4), nad9	sdh4	rpl16, rpl5	rps10(1), rps12, rps14, rps3(1), rps4, rps7	rrn18, rrn26, rrn5	trnM-CAU*, trnQ-UUG*(1), trnS-GGA(1) trnV-CAC(1), trnC-GCA, trnD-GUC, trnE-UUC trnF-GAA, trnG-GCC, trnH-GUG, trnK-UUU trnI-CAU, trnfM-CAU, trnN-GUU, trnP-UGG trnW-CCA, trnY-GUA
Notes：*: Number of copies of multi-copy genes; Gene (number): intron number

## Sheet: Table S5
Table S5. The Lengths of Introns and Exons in the mitochondrion Genome of eight Medicago species
Sample name	Gene	Strand	Start	End	ExonI	IntronI	ExonII	IntronII	ExonIII	IntronIII	ExonIV	IntronIV	ExonV
Medicago lupulina	ccmFC	+	237593	239869	779	948	550
	nad1	+	103401	137797	385	130496	83	1415	192	101639	59	3149	259
	nad2	+	159080	8541	153	1277	392	148169	161	2865	573	2242	188
	nad4	+	265703	274360	461	1411	515	3181	423	2578	89
	nad5	-	145842	30190	230	898	1216	79265	22	40205	395	915	147
	nad7	-	43414	49848	143	897	69	1333	467	1028	244	1992	262
	rps10	+	229740	230996	250	924	83
	rps3	-	57277	60736	74	1783	1603
	trnQ-UUG	-	145649	145727	33	6	40
	trnS-GGA	+	18007	18686	31	585	64
	trnV-CAC	+	54306	54822	31	432	54
Medicago falcata	ccmFC	-	80463	82745	779	954	550
	nad1	-	269491	292281	385	205840	83	1415	192	188589	59	3149	259
	nad2	-	186511	282648	153	1211	392	89846	161	2131	573	1483	188
	nad4	-	317921	326576	461	1406	515	3184	423	2578	89
	nad5	+	345414	261453	230	898	1216	59171	22	28608	395	915	147
	nad7	+	124150	130580	143	893	69	1333	467	1028	244	1992	262
	rps10	-	89342	90592	244	924	83
	rps3	-	216896	220355	74	1783	1603
	trnQ-UUG	+	261568	261646	33	6	40
	trnS-GGA	+	36243	36922	31	585	64
	trnS-GGA	+	196153	196832	31	585	64
Medicago minima	ccmFC	-	243813	246089	779	948	550
	nad1	+	222907	90150	385	26019	83	1688	192	154601	59	3458	259
	nad2	+	116424	55243	153	1244	392	58807	161	2843	573	2235	188
	nad4	+	12519	21150	461	1398	515	3176	423	2570	89
	nad5	-	81760	137486	230	898	1216	91459	22	145737	395	1455	147
	nad7	-	189231	195660	143	897	69	1333	467	1028	244	1987	262
	rps10	-	252658	253909	250	919	83
	rps3	-	203086	206544	74	1782	1603
	trnQ-UUG	+	82021	82099	33	6	40
	trnV-CAC	+	200119	200631	31	428	54
Medicago edgeworthii	ccmFC	-	245095	247378	779	955	550
	nad1	-	223720	61968	385	189094	83	1401	192	28433	59	3465	259
	nad2	+	210826	97852	153	1211	392	119277	161	2143	573	1485	188
	nad4	+	150506	159365	461	1406	515	3178	423	2788	89
	nad5	+	176724	232103	230	898	1216	120795	22	174728	395	1457	147
	nad7	+	135295	141727	143	896	69	1332	467	1028	244	1992	262
	rps10	-	253972	255234	250	930	83
	rps3	+	124447	127890	74	1767	1603
	trnQ-UUG	-	231764	231842	33	6	40
	trnS-GGA	-	87524	88203	31	585	64
	trnV-CAC	-	130340	130852	31	428	54
Medicago platycarpo	ccmFC	+	278809	281063	746	959	550
	nad1	+	215648	145447	385	59426	83	1411	192	135167	59	3154	259
	nad2	+	132314	244810	153	1202	392	114918	161	2854	573	2232	188
	nad4	+	330932	339784	461	1406	515	3173	423	2786	89
	nad5	+	57392	294138	230	893	1216	159594	22	73338	395	912	147
	nad7	+	114090	120530	143	889	69	1333	467	1024	244	2010	262
	rps10	+	270903	272164	250	929	83
	rps3	+	312177	315608	74	1755	1603
	trnQ-UUG	+	294243	294321	33	6	40
	trnS-GGA	+	254239	254918	31	585	64
	trnV-CAC	-	318067	318579	31	428	54
Medicago sativa	ccmFC	+	170950	173233	779	955	550
	nad1	+	39387	62181	385	127867	83	1415	192	110612	59	3149	259
	nad2	+	49016	294034	153	1211	392	238724	161	2136	573	1481	188
	nad4	+	5095	13752	461	1406	515	3186	423	2578	89
	nad5	-	70228	266722	230	898	1216	221295	22	28621	395	915	147
	nad7	+	232579	239013	143	893	69	1333	467	1032	244	1992	262
	rps10	+	163103	164353	244	924	83
	rps3	+	221687	225139	74	1776	1603
	trnQ-UUG	-	70035	70113	33	6	40
	trnS-GGA	-	283711	284390	31	585	64
	trnV-CAC	-	227594	228106	31	428	54
Medicago truncatula	ccmFC	+	185567	187850	779	955	550
	nad1	+	249306	108363	385	67433	83	1415	192	72425	59	3471	259
	nad2	-	270593	121386	153	1310	392	146867	161	2868	573	2242	188
	nad4	+	214987	223641	461	1405	515	3184	423	2578	89
	nad5	+	32174	100052	230	898	1216	218468	22	154410	395	915	147
	nad7	+	129298	135732	143	897	69	1333	467	1028	244	1992	262
	rps10	+	177714	178970	250	924	83
	rps3	+	78932	82344	74	1778	1561
	trnQ-UUG	+	100167	100245	33	6	40
	trnS-GGA	-	260454	261133	31	585	64
Medicago arabica	ccmFC	+	53535	55818	779	955	550
	nad1	+	283616	164036	385	233775	83	1415	192	108656	59	3149	259
	nad2	+	150711	77966	153	1376	392	70480	161	2860	573	2241	188
	nad4	+	221490	230368	461	1406	515	3197	423	2788	89
	nad5	+	2031	172227	230	903	1216	282915	22	114172	395	1455	147
	nad7	+	254891	261325	143	897	69	1333	467	1029	244	1991	262
	rps10	+	45682	46938	250	924	83
	rps3	+	244009	247462	74	1777	1603
	trnQ-UUG	-	171888	171966	33	6	40
	trnS-GGA	+	87417	88096	31	585	64
	trnV-CAC	-	249917	250429	31	428	54

## Sheet: Table S6
Table S6. SSRs in the mitochondrion genome of eight Medicago species
Sample name	SSRs nr.	SSR type	SSR	Size	Start	End
Medicago lupulina	1	p1	(A)10	10	4489	4498
	2	p1	(A)10	10	11160	11169
	3	p1	(T)13	13	17118	17130
	4	p1	(A)10	10	38941	38950
	5	p2	(AT)6	12	43323	43334
	6	p1	(T)11	11	57311	57321
	7	p1	(T)10	10	60975	60984
	8	p1	(T)10	10	62060	62069
	9	p1	(A)10	10	69015	69024
	10	p2	(AT)6	12	81631	81642
	11	p1	(A)10	10	121629	121638
	12	p2	(TA)7	14	128359	128372
	13	p1	(T)10	10	134350	134359
	14	p2	(AT)6	12	149903	149914
	15	p1	(A)10	10	161984	161993
	16	p2	(AT)6	12	171215	171226
	17	p1	(A)10	10	183318	183327
	18	p1	(A)10	10	207170	207179
	19	p3	(TTA)5	15	214044	214058
	20	p1	(A)11	11	240718	240728
	21	p1	(A)11	11	241976	241986
	22	p3	(TAT)5	15	242624	242638
	23	p1	(A)10	10	263910	263919
Medicago falcata	1	p1	(G)10	10	7537	7546
	2	p1	(T)13	13	35359	35371
	3	p2	(CT)6	12	40267	40278
	4	p1	(C)10	10	63078	63087
	5	p3	(ATA)5	15	77689	77703
	6	p1	(T)10	10	78341	78350
	7	p1	(A)10	10	106298	106307
	8	p1	(T)10	10	113175	113184
	9	p1	(T)13	13	195269	195281
	10	p2	(CT)6	12	200177	200188
	11	p1	(T)11	11	216930	216940
	12	p1	(T)10	10	221674	221683
	13	p1	(T)10	10	268776	268785
	14	p1	(A)10	10	272929	272938
	15	p1	(T)11	11	279805	279815
	16	p1	(T)10	10	328355	328364
	17	p1	(T)16	16	334873	334888
Medicago minima	1	p1	(T)11	11	7079	7089
	2	p1	(A)10	10	10755	10764
	3	p1	(A)10	10	51204	51213
	4	p1	(T)12	12	63752	63763
	5	p1	(T)12	12	89184	89195
	6	p1	(A)10	10	93323	93332
	7	p2	(AT)6	12	126615	126626
	8	p1	(A)10	10	146196	146205
	9	p1	(A)11	11	158537	158547
	10	p1	(A)10	10	169788	169797
	11	p1	(T)11	11	203120	203130
	12	p1	(A)10	10	214805	214814
	13	p1	(A)11	11	238331	238341
	14	p3	(ATA)5	15	241052	241066
	15	p1	(T)11	11	241704	241714
	16	p1	(T)10	10	276408	276417
Medicago edgeworthii	1	p1	(A)11	11	16551	16561
	2	p1	(G)10	10	33723	33732
	3	p1	(A)10	10	48562	48571
	4	p1	(A)12	12	89075	89086
	5	p1	(T)10	10	94753	94762
	6	p1	(C)11	11	96952	96962
	7	p1	(A)10	10	104387	104396
	8	p1	(T)10	10	116141	116150
	9	p1	(A)11	11	127846	127856
	10	p1	(A)11	11	136103	136113
	11	p1	(T)11	11	151985	151995
	12	p1	(G)10	10	158084	158093
	13	p1	(A)10	10	161342	161351
	14	p1	(A)10	10	190487	190496
	15	p1	(T)12	12	196554	196565
	16	p2	(CT)6	12	206805	206816
	17	p1	(A)10	10	213664	213673
	18	p1	(T)10	10	220531	220540
	19	p1	(A)10	10	231750	231759
	20	p1	(T)10	10	241739	241748
	21	p1	(T)11	11	277783	277793
Medicago platycarpo	1	p1	(T)10	10	14162	14171
	2	p1	(A)10	10	25474	25483
	3	p3	(AAG)6	18	43719	43736
	4	p1	(A)11	11	45226	45236
	5	p1	(T)10	10	96478	96487
	6	p2	(TA)6	12	100514	100525
	7	p1	(A)12	12	106572	106583
	8	p1	(A)10	10	128648	128657
	9	p1	(A)10	10	135138	135147
	10	p1	(T)10	10	141995	142004
	11	p1	(T)10	10	164091	164100
	12	p1	(A)10	10	181753	181762
	13	p1	(T)10	10	253358	253367
	14	p2	(CT)6	12	304214	304225
	15	p1	(A)11	11	315564	315574
	16	p1	(G)10	10	338509	338518
Medicago sativa	1	p1	(T)10	10	20876	20885
	2	p1	(A)11	11	51854	51864
	3	p1	(T)10	10	58734	58743
	4	p1	(A)10	10	82342	82351
	5	p2	(AT)7	14	113324	113337
	6	p1	(A)10	10	140518	140527
	7	p1	(T)14	14	147391	147404
	8	p1	(A)12	12	175346	175357
	9	p3	(TAT)5	15	175995	176009
	10	p1	(T)10	10	213377	213386
	11	p1	(A)10	10	220356	220365
	12	p1	(A)11	11	225095	225105
	13	p2	(AG)6	12	280346	280357
	14	p1	(A)12	12	285262	285273
Medicago truncatula	1	p1	(C)10	10	18294	18303
	2	p1	(A)10	10	77595	77604
	3	p1	(A)11	11	82343	82353
	4	p1	(A)10	10	111549	111558
	5	p1	(T)10	10	118440	118449
	6	p1	(A)10	10	155124	155133
	7	p1	(T)10	10	161999	162008
	8	p1	(A)10	10	189963	189972
	9	p3	(TAT)5	15	190616	190630
	10	p2	(CT)6	12	201332	201343
	11	p2	(AT)6	12	204371	204382
Medicago arabica	1	p1	(A)10	10	19487	19496
	2	p2	(AT)6	12	34105	34116
	3	p1	(A)10	10	57931	57940
	4	p3	(TAT)5	15	58578	58592
	5	p2	(AT)6	12	99907	99918
	6	p2	(AG)6	12	102979	102990
	7	p1	(A)10	10	126081	126090
	8	p1	(T)12	12	132958	132969
	9	p1	(T)10	10	153621	153630
	10	p1	(A)11	11	153711	153721
	11	p1	(T)10	10	160589	160598
	12	p1	(A)11	11	162152	162162
	13	p1	(A)13	13	164739	164751
	14	p1	(A)11	11	189907	189917
	15	p3	(AAT)6	18	197270	197287
	16	p1	(A)10	10	221252	221261
	17	p1	(A)11	11	247418	247428
	18	p1	(A)11	11	267142	267152
	19	p1	(T)10	10	279702	279711
	20	p1	(A)10	10	288682	288691
	21	p1	(C)10	10	311682	311691
	22	p2	(AT)6	12	314439	314450
	23	p1	(T)13	13	315961	315973

## Sheet: Table S7
Table S7. Tandem repeat （TSRs）sequences in the mitochondrion genome of eight Medicago species
Sample name	TSRs nr.	Indices	Period Size	Copy Number	Consensus Size	Percent Matches	Percent Indels	Score	A	C	G	T	Entropy (0-2)
Medicago lupulina	1	102557--102582	12	2.2	12	100	0	52	50	7	7	34	1.6
	2	115468--115503	19	1.9	19	88	5	56	13	27	27	30	1.94
	3	139274--139313	19	2.1	19	100	0	80	50	10	15	25	1.74
	4	145824--145861	10	3.8	10	86	10	51	28	2	2	65	1.19
	5	151344--151430	12	7.2	12	79	5	86	33	0	44	21	1.53
	6	151337--151388	24	2.2	24	92	0	86	38	0	42	19	1.51
	7	151343--151430	24	3.7	24	87	0	95	34	0	44	21	1.53
	8	158496--158567	30	2.4	30	95	0	126	5	37	37	19	1.75
	9	159267--159375	33	3.3	33	98	0	209	33	14	38	13	1.86
	10	247935--247961	12	2.2	12	100	0	54	14	51	0	33	1.43
Medicago falcata	1	4568--4631	27	2.4	27	97	2	121	17	31	3	48	1.62
	2	65993--66056	27	2.4	27	97	2	121	48	3	31	17	1.62
	3	71670--71694	13	1.9	13	100	0	50	20	8	8	64	1.46
	4	141707--141810	51	2	51	98	0	199	14	35	28	21	1.92
	5	173679--173703	13	1.9	13	100	0	50	64	8	8	20	1.46
	6	247340--247375	19	1.9	19	88	5	56	13	27	27	30	1.94
	7	261434--261471	10	3.8	10	86	10	51	65	2	2	28	1.19
	8	267981--268020	19	2.1	19	100	0	80	25	15	10	50	1.74
	9	283161--283232	30	2.4	30	97	0	135	19	38	36	5	1.75
	10	293100--293125	12	2.2	12	100	0	52	34	7	7	50	1.6
Medicago minima	1	81887--81924	10	3.8	10	86	10	51	65	2	2	28	1.19
	2	88402--88441	19	2.1	19	100	0	80	25	15	10	50	1.74
	3	115828--115911	36	2.3	36	100	0	168	3	35	41	19	1.68
	4	116611--116686	33	2.3	33	97	0	143	32	14	39	13	1.85
	5	164561--164585	13	1.9	13	100	0	50	20	8	8	64	1.46
	6	173374--173409	19	1.9	19	88	5	56	13	27	27	30	1.94
	7	184257--184340	27	3.1	27	91	0	132	28	11	27	32	1.92
	8	222063--222088	12	2.2	12	100	0	52	50	7	7	34	1.6
Medicago edgeworthii	1	20134--20169	19	1.9	19	88	5	56	13	27	27	30	1.94
	2	31020--31076	27	2.1	27	90	0	87	28	12	28	31	1.93
	3	62792--62817	12	2.2	12	100	0	52	34	7	7	50	1.6
	4	71278--71304	12	2.2	12	100	0	54	14	51	0	33	1.43
	5	141816--141868	19	2.8	19	77	11	63	52	0	0	47	1
	6	141808--141863	24	2.3	24	81	0	67	51	1	0	46	1.11
	7	146624--146673	25	2	25	100	0	100	12	32	20	36	1.89
	8	188019--188043	13	1.9	13	100	0	50	20	8	8	64	1.46
	9	225460--225499	19	2.1	19	100	0	80	50	10	15	25	1.74
	10	231939--231976	10	3.8	10	86	10	51	28	2	2	65	1.19
Medicago platycarpo	1	131749--131820	30	2.4	30	100	0	144	6	36	37	19	1.79
	2	146920--146959	19	2.1	19	100	0	80	50	10	15	25	1.74
	3	185335--185370	19	1.9	19	88	5	56	13	27	27	30	1.94
	4	214804--214829	12	2.2	12	100	0	52	50	7	7	34	1.6
Medicago sativa	1	38543--38568	12	2.2	12	100	0	52	50	7	7	34	1.6
	2	48432--48503	30	2.4	30	97	0	135	6	37	36	19	1.79
	3	63661--63700	19	2.1	19	100	0	80	50	10	15	25	1.74
	4	70210--70247	10	3.8	10	86	10	51	28	2	2	65	1.19
	5	95940--95989	25	2	25	100	0	100	36	20	32	12	1.89
	6	119130--119154	13	1.9	13	100	0	50	20	8	8	64	1.46
	7	251809--251844	18	1.9	19	88	5	56	30	27	27	13	1.94
Medicago truncatula	1	45327--45362	19	1.9	19	88	5	56	13	27	27	30	1.94
	2	96190--96280	12	7.6	12	92	0	128	17	47	0	35	1.48
	3	100033--100070	10	3.8	10	86	10	51	65	2	2	28	1.19
	4	106590--106629	19	2.1	19	100	0	80	25	15	10	50	1.74
	5	121058--121199	33	4.3	33	99	0	275	14	38	14	33	1.86
	6	121899--121970	30	2.4	30	97	0	135	19	38	36	5	1.75
	7	195927--195953	12	2.2	12	100	0	54	14	51	0	33	1.43
	8	248462--248487	12	2.2	12	100	0	52	50	7	7	34	1.6
	9	258765--258789	13	1.9	13	100	0	50	64	8	8	20	1.46
Medicago arabica	1	23078--23113	19	1.9	19	88	5	56	13	27	27	30	1.94
	2	150127--150198	30	2.4	30	97	0	135	5	36	38	19	1.75
	3	150898--151105	33	6.3	33	99	0	407	33	14	37	14	1.87
	4	165508--165547	19	2.1	19	100	0	80	50	10	15	25	1.74
	5	172063--172100	10	3.8	10	86	10	51	28	2	2	65	1.19
	6	175838--175869	12	2.7	12	95	0	55	46	0	34	18	1.49
	7	175865--175904	12	3.3	12	85	0	53	30	2	47	20	1.63
	8	176167--176219	27	2	27	85	14	74	39	9	9	41	1.7
	9	186120--186158	18	2.2	18	100	0	78	64	0	25	10	1.25
	10	186235--186265	6	5.2	6	92	0	53	19	45	35	0	1.51
	11	194306--194410	33	3.2	33	97	0	192	39	11	21	27	1.88
	12	194306--194395	18	5.3	18	83	15	129	40	11	21	27	1.87
	13	194309--194410	15	6.4	15	84	12	132	39	11	21	27	1.88
	14	194946--194980	15	2.3	15	100	0	70	42	28	20	8	1.81
	15	197270--197303	12	2.8	12	91	8	52	61	0	5	32	1.2
	16	263355--263393	18	2.2	18	100	0	78	64	0	25	10	1.25
	17	263470--263500	6	5.2	6	92	0	53	19	45	35	0	1.51
	18	282767--282792	12	2.2	12	100	0	52	50	7	7	34	1.6

## Sheet: Table S8
Table S8. Dispersed repeat （DSRs） sequences in the mitochondrion genome of eight Medicago species （P: palindromic repeat; F: forward repeat; C: complementary repeat; R: reverse repeat ）
Sample name	The repeat length of the first part	The starting site of the first part	Matching Direction	The repeat length of the second part	The starting site of the second part	Interval distance of repeats	E-Value
Medicago lupulina	430	127324	P	430	291674	0	3.14e-249
	211	41530	F	211	98666	-1	1.41e-114
	135	148494	F	135	283856	0	1.27e-71
	131	127193	P	131	277876	0	3.25e-69
	129	81997	P	129	125980	-1	2.02e-65
	110	184370	P	110	228784	0	1.43e-56
	97	11713	F	97	47648	0	9.61e-49
	101	97469	P	101	170987	-2	1.71e-46
	93	97477	P	93	170987	-1	6.86e-44
	92	41601	F	92	126423	-1	2.71e-43
	92	98737	F	92	126423	-1	2.71e-43
	86	100723	F	86	253805	0	4.03e-42
	87	8315	F	87	284436	-1	2.63e-40
	82	112867	F	82	186591	0	1.03e-39
	75	41618	F	75	126440	0	1.69e-35
	75	81926	P	75	97976	0	1.69e-35
	75	98754	F	75	126440	0	1.69e-35
	84	2260	P	84	213968	-3	1.66e-34
	73	14429	P	73	215140	0	2.7e-34
	76	159266	F	76	159299	-1	9.63e-34
	72	97498	P	72	170987	0	1.08e-33
	73	102143	F	73	262889	-1	5.92e-32
	67	14424	P	67	230770	0	1.11e-30
	67	159275	F	67	159308	0	1.11e-30
	62	2278	P	62	213972	0	1.13e-27
	62	215151	F	62	230770	0	1.13e-27
	59	44910	P	59	230764	0	7.26e-26
	57	29501	F	57	60081	0	1.16e-24
	54	17422	P	54	215973	0	7.43e-23
	53	14438	F	53	44910	0	2.97e-22
	53	44910	P	53	215151	0	2.97e-22
	55	59769	P	55	274644	-1	3.07e-21
	51	127100	P	51	192525	0	4.76e-21
	50	59684	F	50	244052	0	1.9e-20
	48	226664	P	48	289935	0	3.04e-19
	47	43316	P	47	81601	0	1.22e-18
	47	160448	F	47	235721	0	1.22e-18
	46	59778	P	46	274644	0	4.87e-18
	46	159297	P	46	251694	0	4.87e-18
	45	159330	P	45	251695	0	1.95e-17
	54	96995	P	54	151921	-3	4.98e-17
	47	127481	F	47	227668	-1	1.72e-16
	47	227668	P	47	291900	-1	1.72e-16
	41	96891	P	41	249437	0	4.99e-15
	44	159266	P	44	251694	-1	1.03e-14
	40	59548	F	40	137321	0	2e-14
	43	159266	F	43	159332	-1	4.02e-14
	39	84229	F	39	229669	0	7.98e-14
	39	158958	F	39	271938	0	7.98e-14
	42	2686	F	42	151580	-1	1.57e-13
	45	93699	F	45	259644	-2	1.74e-13
	38	161906	F	38	169608	0	3.19e-13
	46	97451	P	46	171060	-3	2e-12
	43	211547	F	43	279939	-2	2.53e-12
	36	32177	P	36	67456	0	5.11e-12
	36	112804	F	36	186525	0	5.11e-12
	39	127143	P	39	192482	-1	9.34e-12
	42	158495	F	42	158525	-2	9.66e-12
	35	44851	P	35	83440	0	2.04e-11
	35	159275	P	35	251694	0	2.04e-11
	44	148484	F	44	232819	-3	2.79e-11
	34	6517	P	34	213967	0	8.17e-11
	34	127494	F	34	227681	0	8.17e-11
	34	159275	F	34	159341	0	8.17e-11
	34	169546	F	34	266264	0	8.17e-11
	34	227681	P	34	291900	0	8.17e-11
	43	135591	P	43	238180	-3	1.04e-10
	40	54794	F	40	193123	-2	1.4e-10
	37	981	P	37	19142	-1	1.42e-10
	42	137425	F	42	267451	-3	3.87e-10
	36	71801	P	36	135318	-1	5.52e-10
	36	181517	F	36	253767	-1	5.52e-10
	36	204012	P	36	290896	-1	5.52e-10
	36	246910	P	36	290882	-1	5.52e-10
	32	97952	F	32	126078	0	1.31e-09
	32	232831	F	32	283858	0	1.31e-09
	41	152088	F	41	259507	-3	1.44e-09
	31	8371	F	31	284492	0	5.23e-09
	31	37917	F	31	221790	0	5.23e-09
	31	60778	F	31	203914	0	5.23e-09
	31	70627	P	31	291000	0	5.23e-09
	31	81997	P	31	97952	0	5.23e-09
	31	153934	F	31	154121	0	5.23e-09
	37	114241	P	37	185652	-2	7.65e-09
	30	2533	P	30	44800	0	2.09e-08
	30	55768	F	30	137137	0	2.09e-08
	30	90106	P	30	160462	0	2.09e-08
	30	90106	P	30	235735	0	2.09e-08
	30	112967	F	30	186702	0	2.09e-08
	30	137712	F	30	237347	0	2.09e-08
	30	197748	P	30	245490	0	2.09e-08
	36	33142	P	36	204795	-2	2.9e-08
	36	51229	P	36	244015	-2	2.9e-08
	33	2311	F	33	6517	-1	3.24e-08
	33	97015	P	33	282425	-1	3.24e-08
	38	14542	F	38	243867	-3	7.27e-08
	37	162206	P	37	195502	-3	2.68e-07
	34	236095	P	34	271891	-2	4.13e-07
	31	830	F	31	213966	-1	4.86e-07
	31	41611	F	31	184940	-1	4.86e-07
	31	82158	F	31	171113	-1	4.86e-07
	31	90229	F	31	90298	-1	4.86e-07
	31	98747	F	31	184940	-1	4.86e-07
	36	90242	F	36	90311	-3	9.85e-07
	33	151922	F	33	282425	-2	1.55e-06
	30	831	P	30	6521	-1	1.88e-06
	30	30697	F	30	30754	-1	1.88e-06
	30	51567	P	30	292527	-1	1.88e-06
	30	97020	P	30	151920	-1	1.88e-06
	30	178144	F	30	215681	-1	1.88e-06
	30	185324	P	30	226414	-1	1.88e-06
	35	41713	F	35	98849	-3	3.61e-06
	35	151371	F	35	151395	-3	3.61e-06
	32	93662	F	32	259607	-2	5.84e-06
	32	112841	F	32	186561	-2	5.84e-06
	31	31011	P	31	229686	-2	2.19e-05
	31	40672	P	31	276436	-2	2.19e-05
	31	54806	F	31	193135	-2	2.19e-05
	31	114204	P	31	185688	-2	2.19e-05
	31	126433	F	31	184940	-2	2.19e-05
	31	158935	F	31	231579	-2	2.19e-05
	31	186946	P	31	194780	-2	2.19e-05
	31	261484	F	31	275068	-2	2.19e-05
	33	48272	F	33	60077	-3	4.82e-05
	33	108263	P	33	283773	-3	4.82e-05
	33	158711	P	33	158711	-3	4.82e-05
	30	14508	F	30	59687	-2	8.19e-05
	30	14508	F	30	244055	-2	8.19e-05
	30	127449	P	30	192199	-2	8.19e-05
	30	151367	F	30	151403	-2	8.19e-05
	30	192200	F	30	291950	-2	8.19e-05
	30	237150	F	30	243798	-2	8.19e-05
	32	131756	F	32	192626	-3	0.000175
	32	151332	F	32	151356	-3	0.000175
	31	18465	P	31	18465	-3	0.000635
	31	24805	P	31	191516	-3	0.000635
	31	54745	F	31	193069	-3	0.000635
	31	127224	P	31	276363	-3	0.000635
	31	151391	F	31	151403	-3	0.000635
	31	177541	P	31	246839	-3	0.000635
	31	276363	F	31	277945	-3	0.000635
	30	221	F	30	152813	-3	0.00229
	30	832	P	30	2314	-3	0.00229
	30	2416	F	30	125204	-3	0.00229
	30	21746	P	30	44808	-3	0.00229
	30	29268	P	30	226288	-3	0.00229
	30	31812	P	30	115284	-3	0.00229
	30	33082	F	30	77448	-3	0.00229
	30	51238	P	30	244012	-3	0.00229
	30	59498	F	30	243824	-3	0.00229
	30	60437	P	30	271987	-3	0.00229
	30	103347	F	30	276404	-3	0.00229
	30	131011	F	30	225616	-3	0.00229
	30	151355	F	30	151379	-3	0.00229
	30	250279	P	30	278471	-3	0.00229
Medicago falcata	28921	15406	F	28921	175316	0	0
	26298	0	P	26298	44325	0	0
	10892	44325	P	10892	175316	0	0
	4365	141902	P	4365	204232	-1	0
	4355	141912	P	4355	204232	0	0
	4261	70623	P	4261	170488	0	0
	566	14839	F	566	174749	0	0
	566	55218	P	566	174749	0	0
	255	4816	P	255	296954	-1	8.16e-141
	255	65552	F	255	296954	-1	8.16e-141
	244	5010	P	244	333815	0	4.47e-137
	244	65369	F	244	333815	0	4.47e-137
	191	130698	F	191	242333	-1	2.08e-102
	179	4892	P	179	296954	0	6.09e-98
	152	131385	P	152	142707	0	1.1e-81
	152	131385	F	152	207640	0	1.1e-81
	135	9364	P	135	258658	0	1.88e-71
	135	61124	F	135	258658	0	1.88e-71
	126	7019	P	126	121342	0	4.94e-66
	126	63478	F	126	121342	0	4.94e-66
	126	229064	P	126	253952	0	4.94e-66
	129	4267	F	129	142342	-1	2.99e-65
	129	4267	P	129	208028	-1	2.99e-65
	129	66227	P	129	142342	-1	2.99e-65
	129	66227	F	129	208028	-1	2.99e-65
	124	3693	P	124	243987	0	7.91e-65
	124	66806	F	124	243987	0	7.91e-65
	120	4276	F	120	142351	0	2.02e-62
	120	4276	P	120	208028	0	2.02e-62
	104	130785	F	104	242420	0	8.69e-53
	97	29958	P	97	126248	0	1.42e-48
	97	126248	P	97	189868	0	1.42e-48
	93	43078	F	93	298111	-1	1.02e-43
	93	202988	F	93	298111	-1	1.02e-43
	88	140251	F	88	294872	0	3.73e-43
	87	9944	F	87	26562	-1	3.9e-40
	87	9944	F	87	186472	-1	3.9e-40
	87	26562	P	87	60592	-1	3.9e-40
	87	60592	P	87	186472	-1	3.9e-40
	75	65732	F	75	297134	0	2.51e-35
	74	91470	P	74	240985	0	1e-34
	74	141267	P	74	243484	0	1e-34
	73	32670	F	73	105128	0	4.01e-34
	73	105128	F	73	192580	0	4.01e-34
	75	4392	P	75	297630	-1	5.64e-33
	75	66156	F	75	297630	-1	5.64e-33
	80	3814	P	80	243911	-3	5.43e-32
	73	293465	F	73	329311	-1	8.78e-32
	68	3826	P	68	243911	0	4.11e-31
	68	66729	F	68	243911	0	4.11e-31
	67	32665	F	67	89500	0	1.64e-30
	67	89500	F	67	192575	0	1.64e-30
	65	142586	P	65	296847	0	2.63e-29
	65	207848	F	65	296847	0	2.63e-29
	63	66168	F	63	297642	0	4.2e-28
	63	293475	F	63	329321	0	4.2e-28
	66	130630	P	66	144550	-1	1.3e-27
	66	130630	F	66	205883	-1	1.3e-27
	62	89505	F	62	105128	0	1.68e-27
	61	296954	F	61	333998	0	6.73e-27
	64	106317	F	64	169372	-1	2.02e-26
	59	89514	P	59	129024	0	1.08e-25
	57	219700	P	57	346045	0	1.72e-24
	60	16337	F	60	333768	-1	4.84e-24
	60	54226	P	60	333768	-1	4.84e-24
	60	176247	F	60	333768	-1	4.84e-24
	55	60624	P	55	186472	0	2.75e-23
	55	106326	F	55	169381	0	2.75e-23
	54	35658	F	54	104320	0	1.1e-22
	54	104320	F	54	195568	0	1.1e-22
	53	32679	P	53	129030	0	4.41e-22
	53	105137	P	53	129030	0	4.41e-22
	53	129030	P	53	192589	0	4.41e-22
	55	219388	F	55	317582	-1	4.55e-21
	51	4772	F	51	144569	0	7.05e-21
	51	4772	P	51	205879	0	7.05e-21
	51	65800	P	51	144569	0	7.05e-21
	51	65800	F	51	205879	0	7.05e-21
	50	76225	P	50	219303	0	2.82e-20
	53	141706	F	53	141757	-1	7.01e-20
	58	71332	F	58	113083	-3	3.59e-19
	58	113083	P	58	173982	-3	3.59e-19
	48	15446	F	48	93616	0	4.51e-19
	48	55129	P	48	93616	0	4.51e-19
	48	93616	F	48	175356	0	4.51e-19
	47	4772	P	47	130630	0	1.81e-18
	47	65804	F	47	130630	0	1.81e-18
	47	84569	F	47	281298	0	1.81e-18
	46	219397	F	46	317591	0	7.22e-18
	47	17355	F	47	92613	-1	2.55e-16
	47	53221	P	47	92613	-1	2.55e-16
	47	92613	F	47	177265	-1	2.55e-16
	43	113260	P	43	227851	0	4.62e-16
	40	35665	F	40	309711	0	2.96e-14
	40	104327	F	40	309711	0	2.96e-14
	40	195575	F	40	309711	0	2.96e-14
	43	231488	F	43	354227	-1	5.96e-14
	39	282730	F	39	320303	0	1.18e-13
	42	283160	F	42	283190	-1	2.33e-13
	38	41705	P	38	279854	0	4.73e-13
	38	201615	P	38	279854	0	4.73e-13
	40	219167	P	40	269926	-1	3.55e-12
	43	108757	F	43	312299	-2	3.76e-12
	36	115530	P	36	333687	0	7.57e-12
	36	159899	P	36	343390	0	7.57e-12
	39	121002	P	39	234681	-1	1.38e-11
	35	2123	F	35	90627	0	3.03e-11
	35	2918	P	35	129107	0	3.03e-11
	35	67670	F	35	129107	0	3.03e-11
	35	68465	P	35	90627	0	3.03e-11
	44	87474	F	44	258759	-3	4.13e-11
	38	240418	F	38	246292	-1	5.4e-11
	34	24774	F	34	106346	0	1.21e-10
	34	24774	F	34	169401	0	1.21e-10
	34	41643	P	34	325980	0	1.21e-10
	34	45815	P	34	106346	0	1.21e-10
	34	45815	P	34	169401	0	1.21e-10
	34	53234	P	34	92613	0	1.21e-10
	34	72980	F	34	73168	0	1.21e-10
	34	72980	P	34	172170	0	1.21e-10
	34	73168	P	34	172358	0	1.21e-10
	34	106346	F	34	184684	0	1.21e-10
	34	169401	F	34	184684	0	1.21e-10
	34	172170	F	34	172358	0	1.21e-10
	34	201553	P	34	325980	0	1.21e-10
	43	82114	P	43	271653	-3	1.54e-10
	37	19282	F	37	356446	-1	2.1e-10
	37	51304	P	37	356446	-1	2.1e-10
	37	179192	F	37	356446	-1	2.1e-10
	33	4567	F	33	4594	0	4.85e-10
	33	4567	P	33	65996	0	4.85e-10
	33	4594	P	33	66023	0	4.85e-10
	33	65996	F	33	66023	0	4.85e-10
	42	269820	F	42	324790	-3	5.73e-10
	39	71351	F	39	113102	-2	7.89e-10
	39	113102	P	39	173982	-2	7.89e-10
	36	16357	F	36	116315	-1	8.18e-10
	36	54230	P	36	116315	-1	8.18e-10
	36	116315	F	36	176267	-1	8.18e-10
	32	9366	P	32	87474	0	1.94e-09
	32	61225	F	32	87474	0	1.94e-09
	32	142440	P	32	297697	0	1.94e-09
	32	160882	P	32	299573	0	1.94e-09
	32	208027	F	32	297697	0	1.94e-09
	31	4365	P	31	297698	0	7.75e-09
	31	10000	F	31	26618	0	7.75e-09
	31	10000	F	31	186528	0	7.75e-09
	31	16461	F	31	156734	0	7.75e-09
	31	26618	P	31	60592	0	7.75e-09
	31	54131	P	31	156734	0	7.75e-09
	31	66227	F	31	297698	0	7.75e-09
	31	98526	F	31	337636	0	7.75e-09
	31	116418	P	31	220397	0	7.75e-09
	31	121010	P	31	234681	0	7.75e-09
	31	156734	F	31	176371	0	7.75e-09
	40	333687	F	40	342428	-3	7.89e-09
	37	84205	P	37	320355	-2	1.13e-08
	34	89128	P	34	131445	-1	1.24e-08
	34	89128	F	34	142765	-1	1.24e-08
	34	89128	P	34	207700	-1	1.24e-08
	39	141225	P	39	298641	-3	2.92e-08
	30	20796	F	30	129163	0	3.1e-08
	30	49797	P	30	129163	0	3.1e-08
	30	82960	F	30	269545	0	3.1e-08
	30	84572	P	30	305552	0	3.1e-08
	30	129163	F	30	180706	0	3.1e-08
	30	215387	P	30	270120	0	3.1e-08
	30	281301	P	30	305552	0	3.1e-08
	36	76276	P	36	122732	-2	4.29e-08
	36	115533	P	36	342425	-2	4.29e-08
	33	7933	F	33	298633	-1	4.8e-08
	33	20574	F	33	24774	-1	4.8e-08
	33	20574	P	33	45816	-1	4.8e-08
	33	20574	F	33	106346	-1	4.8e-08
	33	20574	F	33	169401	-1	4.8e-08
	33	20574	F	33	184684	-1	4.8e-08
	33	24774	P	33	50016	-1	4.8e-08
	33	24774	F	33	180484	-1	4.8e-08
	33	45816	F	33	50016	-1	4.8e-08
	33	45816	P	33	180484	-1	4.8e-08
	33	50016	P	33	106346	-1	4.8e-08
	33	50016	P	33	169401	-1	4.8e-08
	33	50016	P	33	184684	-1	4.8e-08
	33	62657	P	33	298633	-1	4.8e-08
	33	106346	F	33	180484	-1	4.8e-08
	33	116315	F	33	333788	-1	4.8e-08
	33	155564	P	33	271933	-1	4.8e-08
	33	169401	F	33	180484	-1	4.8e-08
	33	180484	F	33	184684	-1	4.8e-08
	38	32783	P	38	76422	-3	1.08e-07
	38	76422	P	38	192693	-3	1.08e-07
	32	42283	F	32	243882	-1	1.86e-07
	32	202193	F	32	243882	-1	1.86e-07
	37	163804	P	37	279554	-3	3.97e-07
	31	19131	P	31	106350	-1	7.21e-07
	31	19131	P	31	169405	-1	7.21e-07
	31	38640	F	31	346277	-1	7.21e-07
	31	51461	F	31	106350	-1	7.21e-07
	31	51461	F	31	169405	-1	7.21e-07
	31	106350	P	31	179041	-1	7.21e-07
	31	169405	P	31	179041	-1	7.21e-07
	31	198550	F	31	346277	-1	7.21e-07
	31	240494	F	31	296903	-1	7.21e-07
	31	305359	F	31	305428	-1	7.21e-07
	36	73015	F	36	73202	-3	1.46e-06
	36	73015	P	36	172134	-3	1.46e-06
	36	73202	P	36	172321	-3	1.46e-06
	36	172134	F	36	172321	-3	1.46e-06
	36	305341	F	36	305410	-3	1.46e-06
	30	17982	F	30	122399	-1	2.79e-06
	30	19132	P	30	24778	-1	2.79e-06
	30	19132	F	30	45815	-1	2.79e-06
	30	19132	P	30	184688	-1	2.79e-06
	30	24778	F	30	51461	-1	2.79e-06
	30	24778	P	30	179042	-1	2.79e-06
	30	45815	P	30	51461	-1	2.79e-06
	30	45815	F	30	179042	-1	2.79e-06
	30	51461	F	30	184688	-1	2.79e-06
	30	52611	P	30	122399	-1	2.79e-06
	30	108772	F	30	312314	-1	2.79e-06
	30	122399	F	30	177892	-1	2.79e-06
	30	179042	P	30	184688	-1	2.79e-06
	30	344819	F	30	344876	-1	2.79e-06
	32	51316	P	32	356439	-2	8.65e-06
	32	334864	R	32	334864	-2	8.65e-06
	31	4204	P	31	43204	-2	3.25e-05
	31	4204	P	31	203114	-2	3.25e-05
	31	5065	F	31	82693	-2	3.25e-05
	31	43204	F	31	66388	-2	3.25e-05
	31	65527	P	31	82693	-2	3.25e-05
	31	66388	F	31	203114	-2	3.25e-05
	31	82693	P	31	333973	-2	3.25e-05
	31	88727	F	31	282761	-2	3.25e-05
	31	90614	P	31	344561	-2	3.25e-05
	31	234969	P	31	315692	-2	3.25e-05
	31	315814	P	31	334881	-2	3.25e-05
	31	317182	F	31	330758	-2	3.25e-05
	33	6995	F	33	109985	-3	7.14e-05
	33	9281	F	33	287396	-3	7.14e-05
	33	61309	P	33	287396	-3	7.14e-05
	33	63595	P	33	109985	-3	7.14e-05
	33	125688	P	33	219696	-3	7.14e-05
	33	282983	P	33	282983	-3	7.14e-05
	30	17405	P	30	167113	-2	0.000121
	30	32749	P	30	76242	-2	0.000121
	30	32749	F	30	219306	-2	0.000121
	30	53189	F	30	167114	-2	0.000121
	30	76243	P	30	192658	-2	0.000121
	30	76499	F	30	83157	-2	0.000121
	30	84214	P	30	320353	-2	0.000121
	30	167114	P	30	177314	-2	0.000121
	30	192659	F	30	219306	-2	0.000121
	32	20677	P	32	208903	-3	0.00026
	32	49914	F	32	208903	-3	0.00026
	32	180587	P	32	208903	-3	0.00026
	31	167796	P	31	350765	-3	0.000941
	31	314305	F	31	315887	-3	0.000941
	30	19133	P	30	20577	-3	0.0034
	30	19133	F	30	50016	-3	0.0034
	30	19133	P	30	180487	-3	0.0034
	30	20578	F	30	51461	-3	0.0034
	30	20578	P	30	179042	-3	0.0034
	30	50016	P	30	51460	-3	0.0034
	30	50016	F	30	179043	-3	0.0034
	30	51461	F	30	180488	-3	0.0034
	30	76285	P	30	122729	-3	0.0034
	30	76474	P	30	219116	-3	0.0034
	30	94010	P	30	346305	-3	0.0034
	30	129155	P	30	353827	-3	0.0034
	30	149929	F	30	342491	-3	0.0034
	30	179043	P	30	180487	-3	0.0034
	30	220056	F	30	320263	-3	0.0034
	30	234943	P	30	315719	-3	0.0034
	30	247159	F	30	343764	-3	0.0034
	30	292306	F	30	315849	-3	0.0034
Medicago minima	660	113329	P	660	168649	0	0
	294	106356	P	294	148597	-1	1.94e-164
	135	30599	P	135	79119	-1	4.75e-69
	117	4969	F	117	187486	0	8.06e-61
	110	151699	F	110	254760	0	1.32e-56
	119	5042	P	119	126387	-3	3.72e-55
	101	30633	P	101	79119	0	3.46e-51
	97	58401	F	97	193460	0	8.86e-49
	101	5060	P	101	126387	-1	1.05e-48
	93	5068	P	93	126387	0	2.27e-46
	85	6360	F	85	184466	0	1.49e-41
	87	31179	F	87	55017	-1	2.42e-40
	68	61091	F	68	268407	0	2.55e-31
	65	72614	F	65	103249	0	1.63e-29
	70	99842	F	70	229253	-2	3.47e-28
	62	61086	F	62	252816	-1	1.95e-25
	57	136797	F	57	205889	0	1.07e-24
	57	252821	F	57	268407	-1	1.83e-22
	53	230378	P	53	269592	0	2.74e-22
	58	164223	F	58	276316	-2	3.98e-21
	54	190727	F	54	252830	-1	1.11e-20
	50	205492	P	50	239601	0	1.75e-20
	48	36653	F	48	256942	0	2.81e-19
	48	61100	F	48	190727	0	2.81e-19
	48	115827	F	48	115863	0	2.81e-19
	48	190727	F	48	268416	0	2.81e-19
	47	117759	P	47	247906	0	1.12e-18
	49	21417	P	49	205577	-1	1.03e-17
	47	38617	F	47	255939	-1	1.58e-16
	45	99867	F	45	229278	-1	2.43e-15
	50	1308	F	50	63894	-3	9.29e-15
	40	90320	P	40	205356	0	1.84e-14
	43	116610	F	43	116643	-1	3.71e-14
	39	18736	F	39	116302	0	7.36e-14
	39	108092	P	39	253940	0	7.36e-14
	38	119217	F	38	125014	0	2.94e-13
	37	42759	P	37	59957	0	1.18e-12
	43	26690	P	43	271998	-2	2.34e-12
	36	139455	P	36	213246	0	4.71e-12
	45	8355	P	45	73072	-3	6.88e-12
	39	164242	F	39	276335	-1	8.61e-12
	35	107297	P	35	190668	0	1.88e-11
	35	125589	P	35	148888	0	1.88e-11
	44	79220	F	44	250791	-3	2.57e-11
	44	126462	P	44	187559	-3	2.57e-11
	38	152338	P	38	172331	-1	3.36e-11
	34	13080	F	34	124952	0	7.54e-11
	34	53218	P	34	230379	0	7.54e-11
	34	53218	F	34	269610	0	7.54e-11
	34	116619	F	34	116652	0	7.54e-11
	43	92047	P	43	245458	-3	9.58e-11
	40	1318	F	40	63904	-2	1.29e-10
	42	14254	P	42	90221	-3	3.56e-10
	36	37620	F	36	279526	-1	5.09e-10
	31	30601	P	31	250792	0	4.82e-09
	31	31235	F	31	55073	0	4.82e-09
	31	145179	P	31	261813	0	4.82e-09
	31	190750	F	31	252853	0	4.82e-09
	31	206586	P	31	279629	0	4.82e-09
	40	184256	F	40	184283	-3	4.91e-09
	40	200603	F	40	233567	-3	4.91e-09
	37	18686	F	37	247542	-2	7.06e-09
	34	185742	P	34	193685	-1	7.69e-09
	34	187058	F	34	252445	-1	7.69e-09
	30	42058	P	30	190617	0	1.93e-08
	30	89946	F	30	246304	0	1.93e-08
	30	90514	P	30	201577	0	1.93e-08
	36	140420	F	36	278760	-2	2.67e-08
	36	197041	F	36	239652	-2	2.67e-08
	33	4606	P	33	29175	-1	2.98e-08
	33	41836	F	33	53218	-1	2.98e-08
	33	41836	P	33	230380	-1	2.98e-08
	33	41836	F	33	269610	-1	2.98e-08
	33	92327	F	33	217585	-1	2.98e-08
	38	61199	P	38	239798	-3	6.71e-08
	32	8368	P	32	73072	-1	1.16e-07
	37	69972	P	37	142818	-3	2.47e-07
	37	119519	P	37	235944	-3	2.47e-07
	31	6338	F	31	152269	-1	4.49e-07
	31	40393	F	31	230378	-1	4.49e-07
	31	40393	P	31	269614	-1	4.49e-07
	36	42283	F	36	49489	-3	9.08e-07
	30	39244	P	30	197380	-1	1.74e-06
	30	40394	P	30	53222	-1	1.74e-06
	30	137993	F	30	138050	-1	1.74e-06
	31	23318	P	31	157784	-2	2.02e-05
	31	106015	F	31	126513	-2	2.02e-05
	31	116279	P	31	252044	-2	2.02e-05
	31	138307	F	31	253931	-2	2.02e-05
	33	23204	P	33	147917	-3	4.44e-05
	33	30516	P	33	227758	-3	4.44e-05
	33	116055	P	33	116055	-3	4.44e-05
	33	194084	F	33	205885	-3	4.44e-05
	30	18695	F	30	247551	-2	7.55e-05
	30	38667	F	30	232644	-2	7.55e-05
	30	61165	F	30	205495	-2	7.55e-05
	30	61165	P	30	239618	-2	7.55e-05
	30	92060	P	30	245458	-2	7.55e-05
	30	128660	F	30	161208	-2	7.55e-05
	30	239875	F	30	246501	-2	7.55e-05
	32	41939	F	32	183102	-3	0.000161
	32	95880	P	32	233070	-3	0.000161
	31	132116	P	31	231965	-3	0.000585
	31	200554	F	31	233513	-3	0.000585
	31	200615	F	31	233579	-3	0.000585
	30	18785	P	30	206245	-3	0.00212
	30	23164	F	30	222853	-3	0.00212
	30	23292	P	30	157811	-3	0.00212
	30	38564	F	30	232611	-3	0.00212
	30	40395	P	30	41839	-3	0.00212
	30	93321	P	30	127611	-3	0.00212
	30	96627	F	30	258008	-3	0.00212
	30	129061	P	30	190625	-3	0.00212
	30	136564	F	30	257336	-3	0.00212
	30	139091	P	30	173190	-3	0.00212
	30	183314	F	30	187460	-3	0.00212
	30	184256	F	30	184310	-3	0.00212
	30	197050	F	30	239661	-3	0.00212
	30	205306	P	30	239849	-3	0.00212
Medicago edgeworthii	233	6329	F	233	205145	-1	8.31e-128
	198	75014	F	198	197035	-2	2.46e-104
	190	75022	F	190	197043	-1	5.25e-102
	180	75032	F	180	197053	0	9.65e-99
	177	15591	F	177	53976	0	6.18e-97
	135	35550	F	135	234626	0	1.19e-71
	132	31290	F	132	105627	0	7.65e-70
	128	63157	P	128	147637	-1	7.52e-65
	118	63167	P	118	147637	0	2.05e-61
	105	105532	P	105	196294	0	1.38e-53
	109	31158	P	109	143581	-2	2.85e-51
	97	94384	F	97	137395	0	9.03e-49
	94	34815	P	94	158103	-1	1.63e-44
	87	91687	P	87	254130	0	9.46e-43
	87	36130	P	87	97803	-1	2.47e-40
	79	31188	P	79	143581	0	6.2e-38
	76	105456	P	76	196397	0	3.97e-36
	71	75684	P	71	256118	0	4.06e-33
	64	91696	F	64	140171	0	6.66e-29
	64	140171	P	64	254144	0	6.66e-29
	59	91710	P	59	269733	0	6.82e-26
	59	254135	F	59	269733	0	6.82e-26
	62	105388	P	62	196479	-1	1.98e-25
	57	125040	F	57	177355	0	1.09e-24
	54	88733	P	54	268931	0	6.98e-23
	64	5226	F	64	202219	-3	7.49e-23
	53	143637	F	53	197211	0	2.79e-22
	58	187681	F	58	277691	-2	4.06e-21
	51	198414	F	51	209643	0	4.47e-21
	50	125440	F	50	240881	0	1.79e-20
	50	140185	P	50	269742	0	1.79e-20
	52	5234	F	52	202227	-1	1.74e-19
	55	31156	P	55	197211	-2	2.33e-19
	48	41626	F	48	258264	0	2.86e-19
	47	212128	P	47	249206	0	1.14e-18
	46	66711	P	46	236055	0	4.58e-18
	47	43159	F	47	257261	-1	1.61e-16
	50	5771	P	50	78199	-2	1.97e-16
	43	207777	F	43	211012	0	2.93e-16
	41	72786	F	41	199052	0	4.69e-15
	40	125586	P	40	223502	0	1.87e-14
	39	102698	F	39	255265	0	7.5e-14
	39	156733	F	39	210704	0	7.5e-14
	38	208270	F	38	213586	0	3e-13
	43	164954	P	43	273361	-2	2.38e-12
	36	5585	P	36	35550	0	4.8e-12
	36	5585	P	36	234626	0	4.8e-12
	36	117677	P	36	174699	0	4.8e-12
	39	187700	F	39	277710	-1	8.77e-12
	35	103491	P	35	140259	0	1.92e-11
	44	234616	P	44	252104	-3	2.62e-11
	38	19090	F	38	75114	-1	3.42e-11
	38	19090	F	38	197135	-1	3.42e-11
	34	99649	P	34	270955	0	7.68e-11
	34	151067	F	34	208208	0	7.68e-11
	43	221772	F	43	246747	-3	9.76e-11
	33	67713	F	33	72767	0	3.07e-10
	42	152244	F	42	223606	-3	3.63e-10
	32	5587	F	32	252104	0	1.23e-09
	32	35552	P	32	252104	0	1.23e-09
	32	46837	F	32	147196	0	1.23e-09
	32	125354	F	32	159649	0	1.23e-09
	35	5293	F	35	202286	-1	2.02e-09
	31	7982	F	31	153999	0	4.91e-09
	31	36186	P	31	97803	0	4.91e-09
	31	42707	F	31	114506	0	4.91e-09
	31	124373	F	31	281010	0	4.91e-09
	31	168955	F	31	263171	0	4.91e-09
	37	156683	F	37	248842	-2	7.19e-09
	34	143421	P	34	253758	-1	7.83e-09
	30	46600	F	30	140315	0	1.97e-08
	30	83481	P	30	239462	0	1.97e-08
	30	129359	P	30	223318	0	1.97e-08
	30	223893	P	30	247593	0	1.97e-08
	36	42603	F	36	280907	-2	2.72e-08
	36	133883	P	36	240932	-2	2.72e-08
	36	173734	P	36	280135	-2	2.72e-08
	33	34119	F	33	198936	-1	3.04e-08
	33	46378	P	33	99650	-1	3.04e-08
	33	46378	F	33	270955	-1	3.04e-08
	33	113331	F	33	221502	-1	3.04e-08
	38	52157	F	38	52480	-3	6.83e-08
	32	15759	P	32	58696	-1	1.18e-07
	37	74984	F	37	197005	-3	2.52e-07
	37	85719	F	37	213886	-3	2.52e-07
	34	99649	P	34	190017	-2	3.88e-07
	34	190017	F	34	270955	-2	3.88e-07
	31	44935	P	31	270959	-1	4.57e-07
	30	43786	F	30	133551	-1	1.77e-06
	30	44936	F	30	99649	-1	1.77e-06
	30	176128	F	30	176185	-1	1.77e-06
	35	74996	F	35	197017	-3	3.39e-06
	34	6702	F	34	6748	-3	1.24e-05
	34	46377	F	34	190016	-3	1.24e-05
	34	100700	F	34	181724	-3	1.24e-05
	31	31180	P	31	75190	-2	2.06e-05
	31	44936	P	31	190020	-2	2.06e-05
	31	75190	F	31	143637	-2	2.06e-05
	31	114530	F	31	209932	-2	2.06e-05
	31	210681	P	31	253357	-2	2.06e-05
	33	33181	F	33	274589	-3	4.52e-05
	33	35467	F	33	57088	-3	4.52e-05
	33	91620	F	33	241078	-3	4.52e-05
	33	125068	F	33	136836	-3	4.52e-05
	33	161459	F	33	166203	-3	4.52e-05
	33	210457	P	33	210457	-3	4.52e-05
	30	43209	F	30	196169	-2	7.7e-05
	30	66753	P	30	67973	-2	7.7e-05
	30	91658	F	30	125458	-2	7.7e-05
	30	91658	F	30	240899	-2	7.7e-05
	30	105424	P	30	196475	-2	7.7e-05
	30	156692	F	30	248851	-2	7.7e-05
	30	175868	P	30	255259	-2	7.7e-05
	30	241150	F	30	247794	-2	7.7e-05
	32	29858	F	32	46481	-3	0.000165
	32	65719	P	32	105306	-3	0.000165
	31	87713	P	31	87713	-3	0.000596
	31	104864	F	31	130385	-3	0.000596
	31	161378	F	31	162960	-3	0.000596
	31	182069	F	31	195487	-3	0.000596
	30	11959	F	30	220511	-3	0.00215
	30	19953	F	30	175073	-3	0.00215
	30	31019	F	30	31046	-3	0.00215
	30	44937	P	30	46381	-3	0.00215
	30	53537	P	30	238091	-3	0.00215
	30	61993	P	30	161417	-3	0.00215
	30	64975	P	30	259333	-3	0.00215
	30	73621	P	30	163486	-3	0.00215
	30	107677	F	30	173800	-3	0.00215
	30	124711	F	30	156782	-3	0.00215
	30	125647	F	30	241125	-3	0.00215
	30	140307	P	30	185121	-3	0.00215
	30	177615	P	30	258658	-3	0.00215
Medicago platycarpos	4853	71893	F	4853	196320	0	0
	4848	0	P	4848	71899	0	0
	4847	1	P	4847	196326	0	0
	546	47887	F	546	302148	-1	0
	295	48138	F	295	302399	0	8.41e-168
	291	5879	P	291	196037	-2	8.18e-160
	249	120362	P	249	157320	0	4.16e-140
	240	152746	P	240	294622	0	1.09e-134
	225	7406	P	225	67190	-1	7.91e-123
	220	48592	F	220	302833	-2	2.6e-117
	188	120842	F	188	178935	0	2.21e-103
	179	81474	P	179	121498	0	5.8e-98
	144	226214	P	144	314982	-1	2.96e-74
	140	120702	F	140	273231	-2	1.54e-69
	125	41118	F	125	291355	0	1.88e-65
	128	6042	P	128	196037	-1	1.13e-64
	118	226240	P	118	314982	0	3.09e-61
	113	42556	F	113	233025	0	3.16e-58
	119	5944	F	119	169404	-3	5.7e-55
	110	120732	F	110	273261	-1	6.67e-54
	102	7529	P	102	67190	0	1.33e-51
	105	48463	F	105	302716	-2	1.02e-48
	97	116184	P	97	247970	0	1.36e-48
	94	41885	F	94	338528	0	8.69e-47
	97	169404	P	97	196166	-1	3.95e-46
	87	40586	P	87	244584	-1	3.71e-40
	79	120763	F	79	273292	0	9.33e-38
	77	118972	P	77	327401	0	1.49e-36
	76	4537	P	76	227509	0	5.97e-36
	76	72134	F	76	227509	0	5.97e-36
	76	196561	F	76	227509	0	5.97e-36
	74	33448	P	74	250673	0	9.55e-35
	74	84105	F	74	167387	0	9.55e-35
	70	67759	P	70	322037	0	2.45e-32
	65	177278	F	65	269968	0	2.5e-29
	64	250668	P	64	271941	0	1e-28
	73	84378	F	73	341940	-3	6.42e-28
	59	33463	F	59	271941	0	1.03e-25
	69	5857	F	69	168128	-3	1.38e-25
	57	4754	F	57	84310	0	1.64e-24
	57	58023	F	57	312774	0	1.64e-24
	57	71936	P	57	84310	0	1.64e-24
	57	84310	P	57	196363	0	1.64e-24
	64	32259	P	64	208185	-2	1.82e-24
	55	40618	P	55	244584	0	2.63e-23
	58	84285	F	58	167629	-1	7.14e-23
	54	34276	P	54	253654	0	1.05e-22
	55	313066	F	55	340073	-1	4.33e-21
	61	67415	P	61	308199	-3	6.23e-21
	61	109234	F	61	347960	-3	6.23e-21
	50	285221	P	50	313156	0	2.69e-20
	56	67703	P	56	322115	-2	9.1e-20
	52	49534	P	52	68370	-1	2.62e-19
	58	25516	F	58	212521	-3	3.42e-19
	47	84296	F	47	167640	0	1.72e-18
	47	133607	F	47	276894	0	1.72e-18
	47	234351	P	47	324510	0	1.72e-18
	56	167692	P	56	195771	-3	4.91e-18
	49	157560	F	49	227558	-1	1.58e-17
	45	232482	F	45	290142	0	2.75e-17
	47	99636	F	47	268847	-1	2.43e-16
	50	219493	P	50	323873	-2	2.96e-16
	43	132500	F	43	305188	0	4.41e-16
	46	48522	F	46	302775	-1	9.5e-16
	49	238143	P	49	260001	-2	1.14e-15
	42	49544	P	42	68370	0	1.76e-15
	42	131748	F	42	131778	0	1.76e-15
	45	84411	F	45	341973	-1	3.72e-15
	41	112418	P	41	321443	0	7.05e-15
	40	34283	F	40	347962	0	2.82e-14
	40	144971	P	40	313302	0	2.82e-14
	40	253661	P	40	347962	0	2.82e-14
	49	84092	F	49	267504	-3	5.35e-14
	43	120588	P	43	226148	-1	5.68e-14
	46	6017	F	46	169477	-2	6.41e-14
	39	119066	F	39	238953	0	1.13e-13
	39	219504	P	39	323873	0	1.13e-13
	39	239748	F	39	270832	0	1.13e-13
	45	97626	P	45	322517	-2	2.45e-13
	38	135060	F	38	305676	0	4.51e-13
	47	250787	F	47	285041	-3	7.53e-13
	44	5882	F	44	168153	-2	9.38e-13
	44	49184	P	44	160333	-2	9.38e-13
	44	167704	P	44	195771	-2	9.38e-13
	44	168153	P	44	196281	-2	9.38e-13
	37	157572	F	37	227570	0	1.8e-12
	46	23077	P	46	227687	-3	2.82e-12
	46	169477	P	46	196144	-3	2.82e-12
	40	67436	P	40	308199	-1	3.38e-12
	40	67605	P	40	322280	-1	3.38e-12
	40	118917	P	40	327489	-1	3.38e-12
	40	167383	F	40	267513	-1	3.38e-12
	43	25531	F	43	212536	-2	3.58e-12
	43	29842	F	43	345365	-2	3.58e-12
	43	109252	F	43	347978	-2	3.58e-12
	36	55358	P	36	88299	0	7.22e-12
	39	34283	F	39	109236	-1	1.32e-11
	39	109236	P	39	253662	-1	1.32e-11
	35	120596	P	35	226148	0	2.89e-11
	44	23069	F	44	166690	-3	3.94e-11
	44	273985	P	44	291446	-3	3.94e-11
	38	138869	P	38	231851	-1	5.14e-11
	38	176702	F	38	184296	-1	5.14e-11
	34	32260	P	34	242797	0	1.15e-10
	34	99649	F	34	268860	0	1.15e-10
	34	208214	F	34	242797	0	1.15e-10
	34	305614	F	34	331493	0	1.15e-10
	43	143236	P	43	279363	-3	1.47e-10
	40	204997	F	40	318054	-2	1.98e-10
	37	277268	P	37	337104	-1	2e-10
	33	4754	F	33	167654	0	4.62e-10
	33	52242	F	33	298885	0	4.62e-10
	33	71960	P	33	167654	0	4.62e-10
	33	167654	P	33	196387	0	4.62e-10
	42	145075	F	42	332675	-3	5.46e-10
	36	6463	P	36	233105	-1	7.79e-10
	36	84105	F	36	267517	-1	7.79e-10
	32	41209	P	32	273997	0	1.85e-09
	31	22194	P	31	312103	0	7.39e-09
	31	132211	F	31	337154	0	7.39e-09
	31	169530	F	31	237671	0	7.39e-09
	34	4733	F	34	176775	-1	1.18e-08
	34	71980	P	34	176775	-1	1.18e-08
	34	121807	P	34	220201	-1	1.18e-08
	34	176775	P	34	196407	-1	1.18e-08
	39	5842	F	39	168113	-3	2.78e-08
	39	49175	P	39	160347	-3	2.78e-08
	39	96025	P	39	122101	-3	2.78e-08
	30	4000	P	30	133621	0	2.96e-08
	30	4000	P	30	276908	0	2.96e-08
	30	9000	P	30	78263	0	2.96e-08
	30	16029	P	30	286651	0	2.96e-08
	30	55378	F	30	167098	0	2.96e-08
	30	67675	P	30	322195	0	2.96e-08
	30	72717	F	30	133621	0	2.96e-08
	30	72717	F	30	276908	0	2.96e-08
	30	96206	P	30	119113	0	2.96e-08
	30	99026	P	30	321289	0	2.96e-08
	30	120672	P	30	226086	0	2.96e-08
	30	133621	F	30	197144	0	2.96e-08
	30	144782	P	30	317086	0	2.96e-08
	30	145362	F	30	278524	0	2.96e-08
	30	197144	F	30	276908	0	2.96e-08
	36	23074	F	36	54398	-2	4.09e-08
	36	112668	F	36	285184	-2	4.09e-08
	33	6466	P	33	42636	-1	4.57e-08
	33	25541	F	33	212546	-1	4.57e-08
	33	32261	F	33	96425	-1	4.57e-08
	33	96425	P	33	208214	-1	4.57e-08
	33	96425	P	33	242797	-1	4.57e-08
	33	130219	F	33	142966	-1	4.57e-08
	38	90296	F	38	90619	-3	1.03e-07
	32	65781	P	32	119101	-1	1.77e-07
	32	67824	P	32	322003	-1	1.77e-07
	37	104468	P	37	208514	-3	3.79e-07
	37	135360	F	37	202625	-3	3.79e-07
	34	97403	P	34	322744	-2	5.83e-07
	31	4123	F	31	4192	-1	6.87e-07
	31	4123	P	31	72524	-1	6.87e-07
	31	4123	P	31	196951	-1	6.87e-07
	31	4192	P	31	72593	-1	6.87e-07
	31	4192	P	31	197020	-1	6.87e-07
	31	32259	P	31	97876	-1	6.87e-07
	31	48335	F	31	58255	-1	6.87e-07
	31	49639	P	31	262947	-1	6.87e-07
	31	58255	F	31	302596	-1	6.87e-07
	31	67643	P	31	322242	-1	6.87e-07
	31	67728	P	31	322115	-1	6.87e-07
	31	72524	F	31	72593	-1	6.87e-07
	31	72524	F	31	197020	-1	6.87e-07
	31	72593	F	31	196951	-1	6.87e-07
	31	97876	F	31	208218	-1	6.87e-07
	31	113710	F	31	257548	-1	6.87e-07
	31	196951	F	31	197020	-1	6.87e-07
	36	4136	F	36	4205	-3	1.39e-06
	36	4136	P	36	72506	-3	1.39e-06
	36	4136	P	36	196933	-3	1.39e-06
	36	4205	P	36	72575	-3	1.39e-06
	36	4205	P	36	197002	-3	1.39e-06
	36	54398	F	36	166695	-3	1.39e-06
	36	72506	F	36	72575	-3	1.39e-06
	36	72506	F	36	197002	-3	1.39e-06
	36	72575	F	36	196933	-3	1.39e-06
	36	196933	F	36	197002	-3	1.39e-06
	33	3968	P	33	307799	-2	2.19e-06
	33	22295	F	33	227601	-2	2.19e-06
	33	72746	F	33	307799	-2	2.19e-06
	33	197173	F	33	307799	-2	2.19e-06
	30	56792	F	30	56849	-1	2.66e-06
	30	97876	F	30	242801	-1	2.66e-06
	30	121783	F	30	298857	-1	2.66e-06
	30	167432	F	30	267594	-1	2.66e-06
	30	205007	F	30	318064	-1	2.66e-06
	30	268869	F	30	327556	-1	2.66e-06
	35	96034	P	35	122096	-3	5.1e-06
	35	109169	F	35	347900	-3	5.1e-06
	32	49113	P	32	160403	-2	8.25e-06
	34	62386	P	34	241746	-3	1.87e-05
	34	70177	P	34	166627	-3	1.87e-05
	31	4533	P	31	157560	-2	3.09e-05
	31	72183	F	31	157560	-2	3.09e-05
	31	84150	F	31	267594	-2	3.09e-05
	31	132188	F	31	272745	-2	3.09e-05
	31	138829	P	31	231898	-2	3.09e-05
	31	157560	F	31	196610	-2	3.09e-05
	31	171207	F	31	341996	-2	3.09e-05
	31	230636	F	31	340500	-2	3.09e-05
	33	41293	F	33	220480	-3	6.8e-05
	33	54401	P	33	227700	-3	6.8e-05
	33	71031	P	33	341882	-3	6.8e-05
	33	115624	F	33	312802	-3	6.8e-05
	33	131964	P	33	131964	-3	6.8e-05
	33	234426	P	33	324457	-3	6.8e-05
	30	33984	F	30	256970	-2	0.000116
	30	48867	F	30	244357	-2	0.000116
	30	56532	F	30	270847	-2	0.000116
	30	99604	F	30	205927	-2	0.000116
	30	250753	F	30	285224	-2	0.000116
	30	250753	P	30	313173	-2	0.000116
	30	271924	P	30	327465	-2	0.000116
	30	278323	F	30	284972	-2	0.000116
	30	328452	F	30	332003	-2	0.000116
	32	6565	F	32	43908	-3	0.000247
	32	96323	P	32	195046	-3	0.000247
	32	99658	F	32	327556	-3	0.000247
	32	166897	F	32	184110	-3	0.000247
	32	234501	F	32	271658	-3	0.000247
	31	54464	P	31	77457	-3	0.000897
	31	62731	P	31	206611	-3	0.000897
	31	205060	F	31	318112	-3	0.000897
	31	238100	P	31	260048	-3	0.000897
	31	254697	P	31	254697	-3	0.000897
	31	287917	P	31	295849	-3	0.000897
	31	341801	F	31	343383	-3	0.000897
	30	17616	F	30	170919	-3	0.00324
	30	48820	F	30	52614	-3	0.00324
	30	55732	F	30	185154	-3	0.00324
	30	58283	F	30	267467	-3	0.00324
	30	67449	P	30	308196	-3	0.00324
	30	84462	F	30	343609	-3	0.00324
	30	85134	F	30	184292	-3	0.00324
	30	96425	P	30	97875	-3	0.00324
	30	98486	P	30	321805	-3	0.00324
	30	166694	P	30	227707	-3	0.00324
	30	171181	F	30	341970	-3	0.00324
	30	177132	F	30	270096	-3	0.00324
	30	215594	F	30	341842	-3	0.00324
	30	224038	P	30	288015	-3	0.00324
	30	284998	P	30	313362	-3	0.00324
	30	301163	P	30	343909	-3	0.00324
	30	312441	F	30	337203	-3	0.00324
Medicago sativa	2971	0	P	2971	205453	0	0
	676	190137	P	676	241106	-2	0
	666	190147	P	666	241106	-1	0
	328	190485	P	328	241106	0	8.35e-188
	164	113652	P	164	190577	-1	2.25e-86
	164	113652	F	164	241178	-1	2.25e-86
	135	72887	F	135	195168	0	1.32e-71
	124	94136	F	124	182374	0	5.52e-65
	123	3362	F	123	34709	0	2.21e-64
	118	78807	P	118	121054	0	2.26e-61
	117	189314	P	117	195087	-1	3.17e-58
	97	234677	F	97	290576	0	9.94e-49
	99	33938	P	99	113619	-1	1.85e-47
	88	36707	F	88	209136	0	2.61e-43
	85	34755	F	85	190827	0	1.67e-41
	83	190809	P	83	241028	0	2.67e-40
	87	195748	P	87	293985	-1	2.72e-40
	81	110338	P	81	183850	-1	1.04e-36
	77	3408	F	77	190827	0	1.09e-36
	74	89534	F	74	162155	0	7e-35
	73	148498	F	73	287888	0	2.8e-34
	67	164127	F	67	287899	0	1.15e-30
	66	33938	F	66	190675	0	4.58e-30
	66	33938	P	66	241178	0	4.58e-30
	65	3408	P	65	241028	0	1.83e-29
	65	34755	P	65	241028	0	1.83e-29
	62	148509	F	62	164127	0	1.17e-27
	61	110358	P	61	183850	0	4.69e-27
	64	123222	F	64	147316	-1	1.41e-26
	60	189371	P	60	195087	0	1.88e-26
	59	164121	F	59	237457	0	7.51e-26
	57	222284	P	57	266033	0	1.2e-24
	54	149325	F	54	284920	0	7.69e-23
	60	84228	F	60	101219	-2	2.99e-22
	53	148509	F	53	237463	0	3.08e-22
	53	237463	F	53	287899	0	3.08e-22
	55	14035	F	55	222598	-1	3.17e-21
	50	177418	P	50	222688	0	1.97e-20
	58	118792	P	58	140560	-3	2.5e-19
	48	160035	P	48	201250	0	3.15e-19
	47	50318	F	47	169078	0	1.26e-18
	50	120290	F	50	120478	-1	2.95e-18
	54	84178	F	54	101168	-3	5.15e-17
	47	161039	P	47	203050	-1	1.78e-16
	46	180258	P	46	202047	-1	6.96e-16
	42	1654	F	42	95380	0	1.29e-15
	42	33514	F	42	277503	0	1.29e-15
	42	95380	P	42	206728	0	1.29e-15
	45	84243	F	45	101234	-1	2.72e-15
	40	21922	F	40	149332	0	2.06e-14
	40	21922	F	40	284927	0	2.06e-14
	40	61705	P	40	222827	0	2.06e-14
	43	80041	P	43	257861	-1	4.16e-14
	39	11330	F	39	48894	0	8.26e-14
	39	180517	P	39	189268	0	8.26e-14
	42	48431	F	42	48461	-1	1.63e-13
	38	51776	P	38	278880	0	3.3e-13
	41	113294	F	41	239063	-1	6.35e-13
	43	19330	F	43	144901	-2	2.62e-12
	36	72887	P	36	189314	0	5.29e-12
	36	214908	F	36	268709	0	5.29e-12
	39	83230	F	39	132657	-1	9.66e-12
	42	84190	F	42	101180	-2	1e-11
	35	115130	F	35	237540	0	2.11e-11
	35	115925	F	35	163032	0	2.11e-11
	44	72877	F	44	166176	-3	2.88e-11
	38	88967	P	38	252848	-1	3.77e-11
	34	5656	P	34	278946	0	8.46e-11
	34	92074	P	34	189548	0	8.46e-11
	34	123223	F	34	295836	0	8.46e-11
	34	147317	F	34	295836	0	8.46e-11
	34	161052	P	34	203050	0	8.46e-11
	43	59975	P	43	171537	-3	1.07e-10
	40	126442	P	40	227581	-2	1.45e-10
	42	6838	F	42	61809	-3	4e-10
	39	118811	P	39	140560	-2	5.51e-10
	36	137347	F	36	180258	-1	5.71e-10
	36	137347	P	36	202057	-1	5.71e-10
	32	69554	F	32	183105	0	1.35e-09
	32	101395	P	32	128099	0	1.35e-09
	32	166188	P	32	189316	0	1.35e-09
	32	166188	F	32	195170	0	1.35e-09
	31	155142	F	31	274463	0	5.41e-09
	31	195804	P	31	293985	0	5.41e-09
	31	202161	F	31	211742	0	5.41e-09
	37	11280	P	37	169452	-2	7.92e-09
	34	164532	F	34	240880	-1	8.63e-09
	30	1903	P	30	237596	0	2.17e-08
	30	26081	P	30	50332	0	2.17e-08
	30	26081	P	30	169092	0	2.17e-08
	30	61521	P	30	226617	0	2.17e-08
	30	62096	F	30	170704	0	2.17e-08
	30	131067	P	30	178856	0	2.17e-08
	30	203677	F	30	230814	0	2.17e-08
	30	206491	F	30	237596	0	2.17e-08
	36	138129	P	36	269674	-2	3e-08
	36	177381	F	36	231161	-2	3e-08
	36	189023	F	36	209100	-2	3e-08
	33	2122	F	33	123224	-1	3.35e-08
	33	2122	F	33	147318	-1	3.35e-08
	33	2122	F	33	295837	-1	3.35e-08
	33	33001	P	33	193737	-1	3.35e-08
	33	59705	F	33	210572	-1	3.35e-08
	33	123224	P	33	206269	-1	3.35e-08
	33	147318	P	33	206269	-1	3.35e-08
	33	206269	P	33	295837	-1	3.35e-08
	38	177233	P	38	287810	-3	7.52e-08
	37	52080	P	37	128821	-3	2.77e-07
	37	98678	P	37	272081	-3	2.77e-07
	31	3386	P	31	89043	-1	5.03e-07
	31	26204	F	31	26273	-1	5.03e-07
	31	34733	P	31	89043	-1	5.03e-07
	31	123222	F	31	204826	-1	5.03e-07
	31	137249	P	31	221613	-1	5.03e-07
	31	147316	F	31	204826	-1	5.03e-07
	31	265827	F	31	281952	-1	5.03e-07
	36	26217	F	36	26286	-3	1.02e-06
	36	183531	F	36	265798	-3	1.02e-06
	30	204827	F	30	295836	-1	1.95e-06
	30	267229	F	30	267286	-1	1.95e-06
	31	15949	F	31	83518	-2	2.27e-05
	31	48871	F	31	164936	-2	2.27e-05
	31	84294	F	31	101315	-2	2.27e-05
	31	126454	P	31	227578	-2	2.27e-05
	31	163049	P	31	267543	-2	2.27e-05
	33	15835	P	33	277208	-3	4.98e-05
	33	44238	P	33	195085	-3	4.98e-05
	33	48647	P	33	48647	-3	4.98e-05
	33	143683	P	33	192801	-3	4.98e-05
	33	222312	F	33	234117	-3	4.98e-05
	30	11289	P	30	169450	-2	8.48e-05
	30	125519	F	30	203100	-2	8.48e-05
	30	170507	F	30	177164	-2	8.48e-05
	30	177421	P	30	287852	-2	8.48e-05
	30	222706	F	30	287853	-2	8.48e-05
	32	2020	F	32	242088	-3	0.000181
	32	109271	P	32	184446	-3	0.000181
	32	125945	P	32	185486	-3	0.000181
	32	206372	P	32	242088	-3	0.000181
	31	15754	F	31	17336	-3	0.000657
	31	44238	F	31	189400	-3	0.000657
	31	103161	F	31	208424	-3	0.000657
	31	124835	P	31	261335	-3	0.000657
	31	126388	P	31	227639	-3	0.000657
	31	283900	P	31	283900	-3	0.000657
	30	2122	F	30	204828	-3	0.00237
	30	11379	F	30	221955	-3	0.00237
	30	15795	F	30	39333	-3	0.00237
	30	15923	F	30	83492	-3	0.00237
	30	101909	F	30	210535	-3	0.00237
	30	107520	F	30	269614	-3	0.00237
	30	158980	P	30	186233	-3	0.00237
	30	159659	P	30	265800	-3	0.00237
	30	177190	P	30	222887	-3	0.00237
	30	204828	P	30	206272	-3	0.00237
	30	237588	F	30	258274	-3	0.00237
	30	251997	F	30	268344	-3	0.00237
Medicago truncatula	158	56268	F	158	244624	-2	1.74e-80
	135	16340	F	135	97252	0	1.09e-71
	129	56297	F	129	244653	-1	1.73e-65
	109	121057	F	109	121090	-1	1.61e-53
	97	131400	F	97	267320	0	8.26e-49
	101	204143	P	101	243368	-2	1.47e-46
	85	58816	P	85	85100	0	1.39e-41
	88	55839	P	88	136216	-1	5.72e-41
	87	15808	F	87	270731	-1	2.26e-40
	79	55848	P	79	136216	0	5.68e-38
	74	93161	F	74	176761	0	5.82e-35
	73	163105	F	73	264632	0	2.33e-34
	76	121057	F	76	121123	-1	8.29e-34
	75	136104	P	75	243875	-1	3.27e-33
	73	212175	F	73	248048	-1	5.09e-32
	67	178744	F	67	264643	0	9.53e-31
	63	136116	P	63	243875	0	2.44e-28
	62	163116	F	62	178744	0	9.76e-28
	61	20768	P	61	244565	0	3.9e-27
	59	134176	F	59	178738	0	6.24e-26
	57	32805	F	57	79529	0	9.99e-25
	55	15840	F	55	270763	0	1.6e-23
	54	163932	F	54	261663	0	6.39e-23
	53	134182	F	53	163116	0	2.56e-22
	53	134182	F	53	264643	0	2.56e-22
	55	79838	F	55	223923	-1	2.64e-21
	60	96208	F	60	96220	-3	1.44e-20
	50	79928	P	50	192044	0	1.64e-20
	58	155166	F	58	259068	-3	2.08e-19
	48	10345	F	48	174641	0	2.62e-19
	47	58001	P	47	135782	0	1.05e-18
	47	119937	P	47	183695	0	1.05e-18
	47	8375	F	47	175645	-1	1.48e-16
	52	4780	F	52	95985	-3	6.1e-16
	48	90483	P	48	90483	-2	2.66e-15
	41	197429	P	41	242790	0	4.29e-15
	40	80074	F	40	108540	0	1.72e-14
	40	163939	F	40	231819	0	1.72e-14
	40	231819	F	40	261670	0	1.72e-14
	43	121057	F	43	121156	-1	3.46e-14
	39	121468	P	39	221219	0	6.87e-14
	42	121898	F	42	121928	-1	1.35e-13
	38	118488	P	38	202770	0	2.75e-13
	46	204216	P	46	243350	-3	1.72e-12
	43	155181	F	43	259083	-2	2.18e-12
	43	159506	F	43	229218	-2	2.18e-12
	36	30159	P	36	72147	0	4.39e-12
	35	134259	F	35	137618	0	1.76e-11
	44	97353	P	44	180793	-3	2.4e-11
	38	44284	F	38	92585	-1	3.13e-11
	34	964	F	34	161925	0	7.03e-11
	34	8388	F	34	175658	0	7.03e-11
	34	202708	F	34	215548	0	7.03e-11
	43	96196	F	43	96220	-3	8.94e-11
	43	110273	F	43	186154	-3	8.94e-11
	40	84831	P	40	141070	-2	1.2e-10
	40	96216	F	40	96240	-2	1.2e-10
	33	85617	F	33	197410	0	2.81e-10
	42	108434	P	42	216729	-3	3.33e-10
	36	9390	F	36	151960	-1	4.75e-10
	36	9404	F	36	194902	-1	4.75e-10
	32	16441	P	32	180805	0	1.12e-09
	31	4797	F	31	96002	0	4.5e-09
	31	9291	P	31	68979	0	4.5e-09
	31	24414	P	31	169748	0	4.5e-09
	31	78858	P	31	151862	0	4.5e-09
	31	136175	P	31	243851	0	4.5e-09
	31	257405	F	31	257597	0	4.5e-09
	37	184069	P	37	221169	-2	6.58e-09
	30	4951	P	30	134315	0	1.8e-08
	30	83867	F	30	108734	0	1.8e-08
	30	108159	P	30	185321	0	1.8e-08
	30	119940	F	30	235990	0	1.8e-08
	30	145688	P	30	193482	0	1.8e-08
	30	183709	P	30	235990	0	1.8e-08
	36	29189	F	36	152743	-2	2.49e-08
	36	127880	F	36	192007	-2	2.49e-08
	33	965	F	33	5170	-1	2.78e-08
	33	5170	F	33	161926	-1	2.78e-08
	33	17873	F	33	242914	-1	2.78e-08
	33	67814	P	33	110553	-1	2.78e-08
	33	155191	F	33	259093	-1	2.78e-08
	38	88531	F	38	88843	-3	6.26e-08
	38	96189	F	38	96237	-3	6.26e-08
	38	191859	P	38	264554	-3	6.26e-08
	37	118189	F	37	143449	-3	2.3e-07
	31	6615	P	31	161924	-1	4.18e-07
	31	33037	F	31	199705	-1	4.18e-07
	31	236113	F	31	236182	-1	4.18e-07
	36	236126	F	36	236195	-3	8.47e-07
	30	964	P	30	6615	-1	1.62e-06
	30	7765	P	30	127547	-1	1.62e-06
	30	31588	F	30	31645	-1	1.62e-06
	30	84841	P	30	141070	-1	1.62e-06
	35	56398	F	35	244754	-3	3.11e-06
	31	20743	F	31	185587	-2	1.88e-05
	31	31330	F	31	177660	-2	1.88e-05
	31	121499	P	31	179553	-2	1.88e-05
	31	136336	F	31	204269	-2	1.88e-05
	31	210770	F	31	224347	-2	1.88e-05
	33	16525	F	33	254157	-3	4.14e-05
	33	18811	F	33	158288	-3	4.14e-05
	33	21667	F	33	225723	-3	4.14e-05
	33	79557	F	33	130840	-3	4.14e-05
	33	121721	P	33	121721	-3	4.14e-05
	30	8343	P	30	140146	-2	7.05e-05
	30	79946	F	30	264597	-2	7.05e-05
	30	110286	F	30	186167	-2	7.05e-05
	30	185124	F	30	191790	-2	7.05e-05
	30	192047	P	30	264596	-2	7.05e-05
	32	5068	P	32	55061	-3	0.000151
	31	37525	F	31	139463	-3	0.000546
	31	84889	P	31	141016	-3	0.000546
	31	96196	F	31	96232	-3	0.000546
	31	96213	F	31	96249	-3	0.000546
	31	225642	F	31	227224	-3	0.000546
	31	260643	P	31	260643	-3	0.000546
	30	5170	P	30	6614	-3	0.00197
	30	29255	F	30	62160	-3	0.00197
	30	30533	F	30	45146	-3	0.00197
	30	33065	F	30	174265	-3	0.00197
	30	40580	P	30	134307	-3	0.00197
	30	79200	F	30	221268	-3	0.00197
	30	80135	P	30	191815	-3	0.00197
	30	198271	P	30	227750	-3	0.00197
	30	225683	F	30	249252	-3	0.00197
Medicago arabica	7341	184140	F	7341	261375	0	0
	1387	13186	F	1387	190712	0	0
	1232	184316	F	1232	192099	0	0
	1232	192099	F	1232	261551	0	0
	769	13186	F	769	267947	0	0
	255	34142	F	255	278690	-1	6.76e-141
	175	150897	F	175	150930	-1	6.78e-93
	166	150906	F	166	150939	0	3.38e-90
	142	150897	F	142	150963	-1	4.06e-73
	133	150906	F	133	150972	0	2.5e-70
	130	186328	F	130	314834	0	1.6e-68
	130	263563	F	130	314834	0	1.6e-68
	109	150897	F	109	150996	-1	2.3e-53
	100	150906	F	100	151005	0	1.84e-50
	101	33686	F	101	278168	-1	1.4e-48
	94	229106	F	94	310504	0	7.55e-47
	101	100044	F	101	277687	-2	2.09e-46
	93	100052	F	93	277695	-1	8.42e-44
	77	70771	F	77	182795	0	1.3e-36
	86	8424	F	86	200620	-3	1.37e-35
	76	150897	F	76	151029	-1	1.18e-33
	72	100073	F	72	277716	0	1.33e-33
	73	218682	F	73	282353	-1	7.27e-32
	67	150906	F	67	151038	0	1.36e-30
	72	194305	F	72	194338	-2	3.05e-29
	64	83849	F	64	124919	0	8.7e-29
	67	44781	F	67	205155	-1	2.73e-28
	70	64710	F	70	182096	-3	3.14e-26
	59	46706	F	59	259770	0	8.91e-26
	55	8455	F	55	200651	0	2.28e-23
	54	86832	F	54	124102	0	9.12e-23
	57	194320	F	57	194353	-1	2.44e-22
	62	200130	F	62	253365	-3	1.42e-21
	55	230651	F	55	244920	-1	3.76e-21
	50	21366	F	50	268707	0	2.34e-20
	58	13909	F	58	132866	-3	2.97e-19
	58	132866	F	58	191435	-3	2.97e-19
	48	64724	F	48	182110	0	3.74e-19
	47	51663	F	47	152178	0	1.49e-18
	47	64771	F	47	70054	0	1.49e-18
	46	70591	F	46	144803	0	5.98e-18
	46	150928	F	46	181248	0	5.98e-18
	46	150961	F	46	181248	0	5.98e-18
	46	150994	F	46	181248	0	5.98e-18
	46	151027	F	46	181248	0	5.98e-18
	45	151060	F	45	181248	0	2.39e-17
	51	66174	F	51	180013	-2	6.7e-17
	50	70900	F	50	287463	-2	2.58e-16
	42	65426	F	42	104588	0	1.53e-15
	42	270404	F	42	298696	0	1.53e-15
	48	200144	F	48	253379	-2	3.79e-15
	44	150897	F	44	181250	-1	1.26e-14
	47	59821	F	47	83953	-2	1.45e-14
	43	10849	F	43	74667	-1	4.94e-14
	43	150897	F	43	151062	-1	4.94e-14
	39	45611	F	39	188572	0	9.8e-14
	39	45611	F	39	265807	0	9.8e-14
	39	70911	F	39	287474	0	9.8e-14
	39	150589	F	39	227736	0	9.8e-14
	42	150126	F	42	150156	-1	1.93e-13
	46	100026	F	46	277669	-3	2.45e-12
	43	132866	F	43	268670	-2	3.11e-12
	45	184136	F	45	314405	-3	9.16e-12
	35	8319	F	35	200528	0	2.51e-11
	35	150906	F	35	181259	0	2.51e-11
	35	187772	F	35	259853	0	2.51e-11
	35	259853	F	35	265007	0	2.51e-11
	44	48761	F	44	174730	-3	3.42e-11
	38	22035	F	38	204547	-1	4.47e-11
	34	15544	F	34	15737	0	1e-10
	34	75942	F	34	126129	0	1e-10
	34	150906	F	34	151071	0	1e-10
	42	163664	F	42	223233	-3	4.74e-10
	39	8282	F	39	200495	-2	6.53e-10
	39	13928	F	39	132885	-2	6.53e-10
	39	132885	F	39	191454	-2	6.53e-10
	39	194305	F	39	194371	-2	6.53e-10
	36	62864	F	36	303403	-1	6.77e-10
	36	66189	F	36	180028	-1	6.77e-10
	41	261375	F	41	314409	-3	1.76e-09
	31	118308	F	31	318721	0	6.42e-09
	40	7914	F	40	200448	-3	6.53e-09
	40	8414	F	40	200610	-3	6.53e-09
	37	185840	F	37	207761	-2	9.4e-09
	37	207761	F	37	263075	-2	9.4e-09
	30	53289	F	30	163951	0	2.57e-08
	30	61444	F	30	142385	0	2.57e-08
	36	59964	F	36	253473	-2	3.56e-08
	33	42136	F	33	161560	-1	3.97e-08
	33	277233	F	33	311261	-1	3.97e-08
	38	293070	F	38	293387	-3	8.93e-08
	37	144624	F	37	153934	-3	3.29e-07
	31	2662	F	31	244606	-1	5.97e-07
	31	126133	F	31	300609	-1	5.97e-07
	31	136205	F	31	243933	-1	5.97e-07
	31	185952	F	31	204623	-1	5.97e-07
	31	204623	F	31	263187	-1	5.97e-07
	36	8530	F	36	200730	-3	1.21e-06
	36	15579	F	36	15771	-3	1.21e-06
	30	1436	F	30	1493	-1	2.31e-06
	30	2694	F	30	244633	-1	2.31e-06
	30	65184	F	30	137526	-1	2.31e-06
	30	75946	F	30	300609	-1	2.31e-06
	34	47117	F	34	185748	-3	1.62e-05
	34	47117	F	34	262983	-3	1.62e-05
	31	1178	F	31	45628	-2	2.69e-05
	31	47521	F	31	150566	-2	2.69e-05
	31	53555	F	31	314132	-2	2.69e-05
	31	217280	F	31	231075	-2	2.69e-05
	31	232443	F	31	315966	-2	2.69e-05
	33	244634	F	33	256433	-3	5.91e-05
	33	288461	F	33	309913	-3	5.91e-05
	30	7924	F	30	200458	-2	0.000101
	30	53092	F	30	59752	-2	0.000101
	30	60004	F	30	83919	-2	0.000101
	32	68685	F	32	107505	-3	0.000215
	31	2693	F	31	256431	-3	0.000779
	31	7387	F	31	106400	-3	0.000779
	31	232370	F	31	233952	-3	0.000779
	30	381	F	30	22897	-3	0.00282
	30	36481	F	30	323576	-3	0.00282
	30	61925	F	30	62233	-3	0.00282
	30	65399	F	30	113787	-3	0.00282
	30	150143	F	30	150173	-3	0.00282
	30	227785	F	30	244277	-3	0.00282
	30	232411	F	30	283562	-3	0.00282

## Sheet: Table S9
Table S9. Codon usage and relative synonymous codon usage (RSCU) of protein-coding genes in the mitochondrial genomes of eight Medicago species. Codons with RSCU values greater than 1.00 are indicated in bold to highlight their preference in the genome.
Amino Acid	Codon	Medicago lupulina		Medicago falcata		Medicago minima		Medicago edgeworthii		Medicago platycarpo		Medicago sativa		Medicago truncatula		Medicago arabica
		Number	RSCU	Number	RSCU	Number	RSCU	Number	RSCU	Number	RSCU	Number	RSCU	Number	RSCU	Number	RSCU
Ala	GCT	246	2.53217	292	2.53582	248	2.55249	247	2.55456	246	2.54106	245	2.54176	249	2.51846	266	2.55131
	GCA	164	1.68811	192	1.66739	165	1.69823	165	1.70648	164	1.69404	163	1.69105	167	1.68909	175	1.6785
	GCC	145	1.49254	167	1.45028	145	1.49238	145	1.49964	144	1.48745	145	1.50431	151	1.52726	159	1.52503
	GCG	75	0.772002	86	0.746852	76	0.782215	77	0.796359	76	0.785043	75	0.778089	77	0.7788	82	0.786495
Arg	AGA	159	1.63664	188	1.63265	159	1.63648	157	1.62375	156	1.6114	156	1.61843	159	1.60817	169	1.62095
	CGA	147	1.51312	173	1.50239	146	1.50268	147	1.52032	146	1.50811	146	1.51468	151	1.52726	160	1.53462
	CGT	136	1.3999	156	1.35475	136	1.39975	135	1.39621	137	1.41514	136	1.41093	137	1.38566	139	1.33321
	AGG	79	0.813176	92	0.798958	80	0.823384	79	0.817044	79	0.816031	78	0.809213	82	0.829372	82	0.786495
	CGG	81	0.833762	96	0.833695	81	0.833676	81	0.837729	81	0.83669	81	0.840336	83	0.839486	85	0.81527
	CGC	64	0.658775	75	0.651324	63	0.648415	62	0.641225	63	0.650759	64	0.663969	63	0.6372	70	0.671398
Asn	AAT	213	2.19249	258	2.24056	212	2.18197	212	2.19257	210	2.1692	209	2.16827	219	2.21503	230	2.20602
	AAC	107	1.10139	122	1.05949	108	1.11157	105	1.08594	104	1.07427	104	1.07895	111	1.12269	111	1.06465
Asp	GAT	213	2.19249	252	2.18845	207	2.13051	211	2.18223	210	2.1692	209	2.16827	213	2.15434	227	2.17725
	GAC	101	1.03963	122	1.05949	103	1.06011	101	1.04458	103	1.06394	103	1.06858	105	1.062	110	1.05505
Cys	TGT	91	0.936696	106	0.920538	91	0.936599	91	0.941152	90	0.929656	91	0.944081	93	0.940629	97	0.930366
	TGC	54	0.555841	63	0.547112	52	0.5352	50	0.517117	50	0.516476	52	0.539475	51	0.515829	53	0.508345
Gln	CAG	68	0.699949	78	0.677377	66	0.679292	68	0.703279	69	0.712736	67	0.695093	68	0.687772	75	0.719355
	GAA	266	2.73803	344	2.98741	270	2.77892	270	2.79243	270	2.78897	268	2.78037	272	2.75109	306	2.93497
	GAG	121	1.2455	150	1.30265	122	1.25566	122	1.26176	125	1.29119	119	1.23457	127	1.28452	132	1.26607
Gly	GGA	248	2.55275	294	2.55319	248	2.55249	248	2.5649	249	2.57205	246	2.55213	255	2.57914	273	2.61845
	GGT	217	2.23366	266	2.31003	218	2.24372	217	2.24429	219	2.26216	216	2.2409	222	2.24537	234	2.24439
	GGG	118	1.21462	150	1.30265	122	1.25566	121	1.25142	119	1.22921	117	1.21382	122	1.23394	130	1.24688
	GGC	87	0.895522	103	0.894485	88	0.905723	88	0.910125	88	0.908997	86	0.892209	89	0.900172	97	0.930366
His	CAT	177	1.82192	216	1.87581	176	1.81145	176	1.82025	176	1.81799	176	1.82592	179	1.81046	186	1.784
	CAC	60	0.617602	72	0.625271	60	0.617538	60	0.62054	59	0.609441	60	0.622471	61	0.616972	63	0.604259
Ile	ATT	337	3.46886	400	3.47373	333	3.42734	334	3.45434	333	3.43973	334	3.46509	342	3.45909	366	3.51045
	ATA	233	2.39835	276	2.39687	234	2.4084	230	2.37874	234	2.41711	231	2.39651	237	2.39709	249	2.38826
	ATC	202	2.07926	246	2.13634	200	2.05846	201	2.07881	200	2.0659	200	2.0749	205	2.07343	224	2.14847
Leu	TTA	265	2.72774	319	2.7703	265	2.72746	264	2.73038	263	2.71666	262	2.71812	270	2.73086	288	2.76232
	CTT	215	2.21307	260	2.25792	214	2.20255	215	2.2236	211	2.17953	210	2.17865	222	2.24537	232	2.22521
	TTG	197	2.02779	230	1.99739	197	2.02758	193	1.99607	196	2.02458	195	2.02303	200	2.02286	210	2.0142
	CTA	160	1.64694	190	1.65002	161	1.65706	157	1.62375	157	1.62173	158	1.63917	165	1.66886	173	1.65931
	CTC	100	1.02934	121	1.0508	101	1.03952	100	1.03423	98	1.01229	100	1.03745	103	1.04177	104	0.997506
	CTG	100	1.02934	112	0.972644	101	1.03952	99	1.02389	98	1.01229	99	1.02708	101	1.02154	100	0.959141
Lys	AAA	241	2.4807	286	2.48372	241	2.48044	238	2.46147	242	2.49974	238	2.46914	248	2.50834	266	2.55131
	AAG	154	1.58518	178	1.54581	156	1.6056	156	1.6134	156	1.6114	155	1.60805	158	1.59806	165	1.58258
Met	ATG	256	2.6351	295	2.56188	255	2.62454	255	2.63729	254	2.6237	256	2.65588	259	2.6196	274	2.62805
Phe	TTT	364	3.74678	421	3.6561	366	3.76698	368	3.80598	367	3.79093	365	3.7867	371	3.7524	382	3.66392
	TTC	264	2.71745	303	2.63135	263	2.70688	260	2.68901	260	2.68567	262	2.71812	267	2.70052	274	2.62805
Pro	CAA	200	2.05867	240	2.08424	200	2.05846	198	2.04778	198	2.04524	198	2.05415	201	2.03297	217	2.08134
	CCT	200	2.05867	231	2.00608	200	2.05846	196	2.0271	198	2.04524	198	2.05415	200	2.02286	210	2.0142
	CCA	144	1.48224	162	1.40686	144	1.48209	141	1.45827	143	1.47712	143	1.48356	147	1.4868	157	1.50585
	CCC	113	1.16315	137	1.18975	116	1.19391	110	1.13766	112	1.15691	111	1.15157	114	1.15303	128	1.2277
	CCG	84	0.864642	97	0.84238	82	0.843969	82	0.848071	82	0.84702	81	0.840336	86	0.869829	86	0.824861
Ser	TCT	195	2.00721	230	1.99739	196	2.01729	192	1.98573	192	1.98327	193	2.00228	196	1.9824	207	1.98542
	AGT	153	1.57488	176	1.52844	154	1.58501	153	1.58238	154	1.59074	153	1.5873	154	1.5576	161	1.54422
	TCA	169	1.73958	203	1.76292	171	1.75998	169	1.74785	171	1.76635	169	1.75329	174	1.75989	184	1.76482
	TCC	133	1.36902	155	1.34607	133	1.36888	132	1.36519	131	1.35317	132	1.36944	135	1.36543	138	1.32361
	TCG	127	1.30726	152	1.32002	126	1.29683	127	1.31348	127	1.31185	127	1.31756	130	1.31486	137	1.31402
	AGC	92	0.946989	108	0.937907	92	0.946892	92	0.951494	93	0.960645	93	0.96483	96	0.970972	100	0.959141
Thr	ACT	167	1.71899	196	1.70213	168	1.72911	165	1.70648	165	1.70437	165	1.7118	168	1.6992	177	1.69768
	ACA	127	1.30726	153	1.3287	127	1.30712	127	1.31348	129	1.33251	127	1.31756	133	1.3452	138	1.32361
	ACC	126	1.29696	150	1.30265	125	1.28654	125	1.29279	126	1.30152	125	1.29682	127	1.28452	133	1.27566
	ACG	65	0.669068	78	0.677377	65	0.669	65	0.672252	65	0.671418	65	0.674344	66	0.667543	71	0.68099
	TGG	138	1.42048	161	1.39818	137	1.41005	139	1.43758	139	1.4358	139	1.44206	141	1.42612	146	1.40035
Tyr	TAT	240	2.47041	285	2.47503	241	2.48044	238	2.46147	239	2.46875	238	2.46914	242	2.44766	256	2.4554
	TAC	74	0.761709	83	0.720799	74	0.76163	75	0.775675	74	0.764384	74	0.767714	73	0.738343	77	0.738538
Val	GTT	184	1.89398	223	1.9366	183	1.88349	184	1.90299	183	1.8903	182	1.88816	185	1.87114	202	1.93746
	GTA	190	1.95574	230	1.99739	187	1.92466	189	1.9547	191	1.97294	185	1.91929	192	1.94194	203	1.94706
	GTG	126	1.29696	151	1.31133	126	1.29683	126	1.30313	126	1.30152	126	1.30719	129	1.30474	135	1.29484
	GTC	112	1.15286	126	1.09422	109	1.12186	109	1.12731	111	1.14658	108	1.12045	112	1.1328	112	1.07424
STOP	TAA	17	0.174987	20	0.173686	17	0.174969	16	0.165477	17	0.175602	16	0.165992	19	0.192172	19	0.182237
	TGA	9	0.0926402	12	0.104212	9	0.0926307	8	0.0827386	8	0.0826361	9	0.0933707	9	0.0910286	8	0.0767312
	TAG	5	0.0514668	6	0.0521059	5	0.0514615	6	0.062054	5	0.0516476	5	0.0518726	4	0.0404572	6	0.0575484

## Sheet: Table S10
Table S10. Statistics of RNA editing types and the number of corresponding sites in 31 protein-coding genes across eight Medicago species.
sample	Genes	Number of RNA editing sites
		C→U	U→C	Total
Medicago lupulina	cox1	17	0	17
Medicago lupulina	nad1	24	1	25
Medicago lupulina	mttB	25	1	26
Medicago lupulina	nad7	32	1	33
Medicago lupulina	matR	9	1	10
Medicago lupulina	rpl16	3	0	3
Medicago lupulina	rps3	8	2	10
Medicago lupulina	nad2	36	4	40
Medicago lupulina	nad5	28	1	29
Medicago lupulina	rps14	1	0	1
Medicago lupulina	rpl5	10	0	10
Medicago lupulina	ccmFn	30	0	30
Medicago lupulina	atp4	10	0	10
Medicago lupulina	nad4L	13	0	13
Medicago lupulina	atp6	8	6	14
Medicago lupulina	nad4	40	0	40
Medicago lupulina	rps4	16	0	16
Medicago lupulina	atp1	1	0	1
Medicago lupulina	ccmFc	16	1	17
Medicago lupulina	atp9	2	0	2
Medicago lupulina	nad6	13	0	13
Medicago lupulina	nad9	6	1	7
Medicago lupulina	cob	15	0	15
Medicago lupulina	ccmB	28	0	28
Medicago lupulina	cox3	12	0	12
Medicago lupulina	atp8	6	0	6
Medicago lupulina	nad3	13	1	14
Medicago lupulina	rps12	7	1	8
Medicago lupulina	ccmC	26	0	26
Medicago lupulina	cox2	12	0	12
Medicago lupulina	rps10	5	2	7
Medicago falcata	cox1	17	0	17
Medicago falcata	nad1	20	1	21
Medicago falcata	mttB	25	1	26
Medicago falcata	nad7	28	1	29
Medicago falcata	matR	9	1	10
Medicago falcata	rpl16	3	0	3
Medicago falcata	rps3	8	2	10
Medicago falcata	nad2	38	8	46
Medicago falcata	nad5	28	1	29
Medicago falcata	rps14	1	0	1
Medicago falcata	rpl5	10	0	10
Medicago falcata	ccmFn	30	0	30
Medicago falcata	atp4	20	0	20
Medicago falcata	nad4L	26	0	26
Medicago falcata	atp6	9	8	17
Medicago falcata	nad4	33	0	33
Medicago falcata	rps4	16	0	16
Medicago falcata	atp1	2	0	2
Medicago falcata	ccmFc	16	1	17
Medicago falcata	atp9	2	0	2
Medicago falcata	nad6	11	0	11
Medicago falcata	nad9	6	1	7
Medicago falcata	cob	15	0	15
Medicago falcata	ccmB	56	0	56
Medicago falcata	cox3	24	0	24
Medicago falcata	atp8	12	0	12
Medicago falcata	nad3	13	1	14
Medicago falcata	rps12	7	1	8
Medicago falcata	ccmC	26	0	26
Medicago falcata	cox2	23	0	23
Medicago falcata	rps10	5	2	7
Medicago minima	cox1	17	0	17
Medicago minima	nad1	15	1	16
Medicago minima	mttB	25	1	26
Medicago minima	nad7	28	1	29
Medicago minima	matR	9	1	10
Medicago minima	rpl16	3	0	3
Medicago minima	rps3	8	2	10
Medicago minima	nad2	24	3	27
Medicago minima	nad5	28	1	29
Medicago minima	rps14	1	0	1
Medicago minima	rpl5	11	0	11
Medicago minima	ccmFn	30	0	30
Medicago minima	atp4	12	2	14
Medicago minima	nad4L	13	0	13
Medicago minima	atp6	7	10	17
Medicago minima	nad4	33	0	33
Medicago minima	rps4	16	0	16
Medicago minima	atp1	1	0	1
Medicago minima	ccmFc	16	1	17
Medicago minima	atp9	2	0	2
Medicago minima	nad6	11	0	11
Medicago minima	nad9	6	1	7
Medicago minima	cob	15	0	15
Medicago minima	ccmB	28	0	28
Medicago minima	cox3	12	0	12
Medicago minima	atp8	4	0	4
Medicago minima	nad3	12	1	13
Medicago minima	rps12	7	1	8
Medicago minima	ccmC	26	0	26
Medicago minima	cox2	12	1	13
Medicago minima	rps10	5	2	7
Medicago edgeworthii	cox1	17	0	17
Medicago edgeworthii	nad1	20	1	21
Medicago edgeworthii	mttB	25	1	26
Medicago edgeworthii	nad7	29	1	30
Medicago edgeworthii	matR	9	1	10
Medicago edgeworthii	rpl16	3	0	3
Medicago edgeworthii	rps3	8	2	10
Medicago edgeworthii	nad2	24	4	28
Medicago edgeworthii	nad5	28	1	29
Medicago edgeworthii	rps14	1	0	1
Medicago edgeworthii	rpl5	10	0	10
Medicago edgeworthii	ccmFn	30	0	30
Medicago edgeworthii	atp4	10	0	10
Medicago edgeworthii	nad4L	13	0	13
Medicago edgeworthii	atp6	5	6	11
Medicago edgeworthii	nad4	18	0	18
Medicago edgeworthii	rps4	16	0	16
Medicago edgeworthii	atp1	1	0	1
Medicago edgeworthii	ccmFc	16	1	17
Medicago edgeworthii	atp9	2	0	2
Medicago edgeworthii	nad6	14	0	14
Medicago edgeworthii	nad9	6	1	7
Medicago edgeworthii	cob	15	1	16
Medicago edgeworthii	ccmB	28	0	28
Medicago edgeworthii	cox3	12	0	12
Medicago edgeworthii	atp8	4	0	4
Medicago edgeworthii	nad3	13	1	14
Medicago edgeworthii	rps12	7	1	8
Medicago edgeworthii	ccmC	26	0	26
Medicago edgeworthii	cox2	12	1	13
Medicago edgeworthii	rps10	5	2	7
Medicago platycarpos	cox1	17	2	19
Medicago platycarpos	nad1	20	1	21
Medicago platycarpos	mttB	25	1	26
Medicago platycarpos	nad7	35	1	36
Medicago platycarpos	matR	9	1	10
Medicago platycarpos	rpl16	4	0	4
Medicago platycarpos	rps3	8	2	10
Medicago platycarpos	nad2	24	3	27
Medicago platycarpos	nad5	28	1	29
Medicago platycarpos	rps14	1	0	1
Medicago platycarpos	rpl5	9	0	9
Medicago platycarpos	ccmFn	30	0	30
Medicago platycarpos	atp4	10	0	10
Medicago platycarpos	nad4L	13	0	13
Medicago platycarpos	atp6	10	15	25
Medicago platycarpos	nad4	32	0	32
Medicago platycarpos	rps4	16	0	16
Medicago platycarpos	atp1	1	0	1
Medicago platycarpos	ccmFc	16	1	17
Medicago platycarpos	atp9	2	0	2
Medicago platycarpos	nad6	10	0	10
Medicago platycarpos	nad9	6	1	7
Medicago platycarpos	cob	19	1	20
Medicago platycarpos	ccmB	28	0	28
Medicago platycarpos	cox3	12	0	12
Medicago platycarpos	atp8	8	0	8
Medicago platycarpos	nad3	14	3	17
Medicago platycarpos	rps12	7	1	8
Medicago platycarpos	ccmC	27	0	27
Medicago platycarpos	cox2	12	1	13
Medicago platycarpos	rps10	5	2	7
Medicago sativa	cox1	17	0	17
Medicago sativa	nad1	20	1	21
Medicago sativa	mttB	25	1	26
Medicago sativa	nad7	29	1	30
Medicago sativa	matR	9	1	10
Medicago sativa	rpl16	3	0	3
Medicago sativa	rps3	8	2	10
Medicago sativa	nad2	24	4	28
Medicago sativa	nad5	28	1	29
Medicago sativa	rps14	1	0	1
Medicago sativa	rpl5	10	0	10
Medicago sativa	ccmFn	30	0	30
Medicago sativa	atp4	10	0	10
Medicago sativa	nad4L	13	0	13
Medicago sativa	atp6	5	6	11
Medicago sativa	nad4	33	0	33
Medicago sativa	rps4	16	0	16
Medicago sativa	atp1	1	0	1
Medicago sativa	ccmFc	15	1	16
Medicago sativa	atp9	2	0	2
Medicago sativa	nad6	11	0	11
Medicago sativa	nad9	6	1	7
Medicago sativa	cob	15	0	15
Medicago sativa	ccmB	28	0	28
Medicago sativa	cox3	12	0	12
Medicago sativa	atp8	4	0	4
Medicago sativa	nad3	13	1	14
Medicago sativa	rps12	7	1	8
Medicago sativa	ccmC	26	0	26
Medicago sativa	cox2	23	0	23
Medicago sativa	rps10	5	2	7
Medicago truncatula	cox1	17	0	17
Medicago truncatula	nad1	20	1	21
Medicago truncatula	mttB	25	1	26
Medicago truncatula	nad7	29	1	30
Medicago truncatula	matR	9	1	10
Medicago truncatula	rpl16	3	0	3
Medicago truncatula	rps3	8	3	11
Medicago truncatula	nad2	24	4	28
Medicago truncatula	nad5	28	1	29
Medicago truncatula	rps14	1	0	1
Medicago truncatula	rpl5	9	0	9
Medicago truncatula	ccmFn	30	0	30
Medicago truncatula	atp4	10	0	10
Medicago truncatula	nad4L	13	0	13
Medicago truncatula	atp6	7	7	14
Medicago truncatula	nad4	33	0	33
Medicago truncatula	rps4	16	0	16
Medicago truncatula	atp1	1	0	1
Medicago truncatula	ccmFc	7	0	7
Medicago truncatula	atp9	11	1	12
Medicago truncatula	nad6	11	0	11
Medicago truncatula	nad9	6	1	7
Medicago truncatula	cob	15	0	15
Medicago truncatula	ccmB	29	0	29
Medicago truncatula	cox3	12	0	12
Medicago truncatula	atp8	6	0	6
Medicago truncatula	nad3	12	1	13
Medicago truncatula	rps12	7	1	8
Medicago truncatula	ccmC	26	0	26
Medicago truncatula	cox2	12	1	13
Medicago truncatula	rps10	5	2	7
Medicago arabica	cox1	17	0	17
Medicago arabica	nad1	20	1	21
Medicago arabica	mttB	25	1	26
Medicago arabica	nad7	28	1	29
Medicago arabica	matR	9	1	10
Medicago arabica	rpl16	3	0	3
Medicago arabica	rps3	8	2	10
Medicago arabica	nad2	24	4	28
Medicago arabica	nad5	28	1	29
Medicago arabica	rps14	1	0	1
Medicago arabica	rpl5	11	0	11
Medicago arabica	ccmFn	30	1	31
Medicago arabica	atp4	20	0	20
Medicago arabica	nad4L	26	0	26
Medicago arabica	atp6	7	7	14
Medicago arabica	nad4	33	0	33
Medicago arabica	rps4	16	0	16
Medicago arabica	atp1	2	0	2
Medicago arabica	ccmFc	16	1	17
Medicago arabica	atp9	2	0	2
Medicago arabica	nad6	11	0	11
Medicago arabica	nad9	6	1	7
Medicago arabica	cob	15	0	15
Medicago arabica	ccmB	28	0	28
Medicago arabica	cox3	12	0	12
Medicago arabica	atp8	10	0	10
Medicago arabica	nad3	13	1	14
Medicago arabica	rps12	7	1	8
Medicago arabica	ccmC	26	0	26
Medicago arabica	cox2	20	8	28
Medicago arabica	rps10	5	2	7

[truncated: 4 more sheets: Table S11, Table S12, Table S13, Table S14]
