# Supplementary material for: Assembly and Comparative Analysis of Chromosomal Mitochondrial Genomes in Multiple Medicago Species
Source: Research Square preprint supplement (doi:10.21203/rs.3.rs-7230374/v1), 2025-08-12
Supplement: Supplementary file 1 [file 4ce61741fc3f2a52a93863bf.pdf]

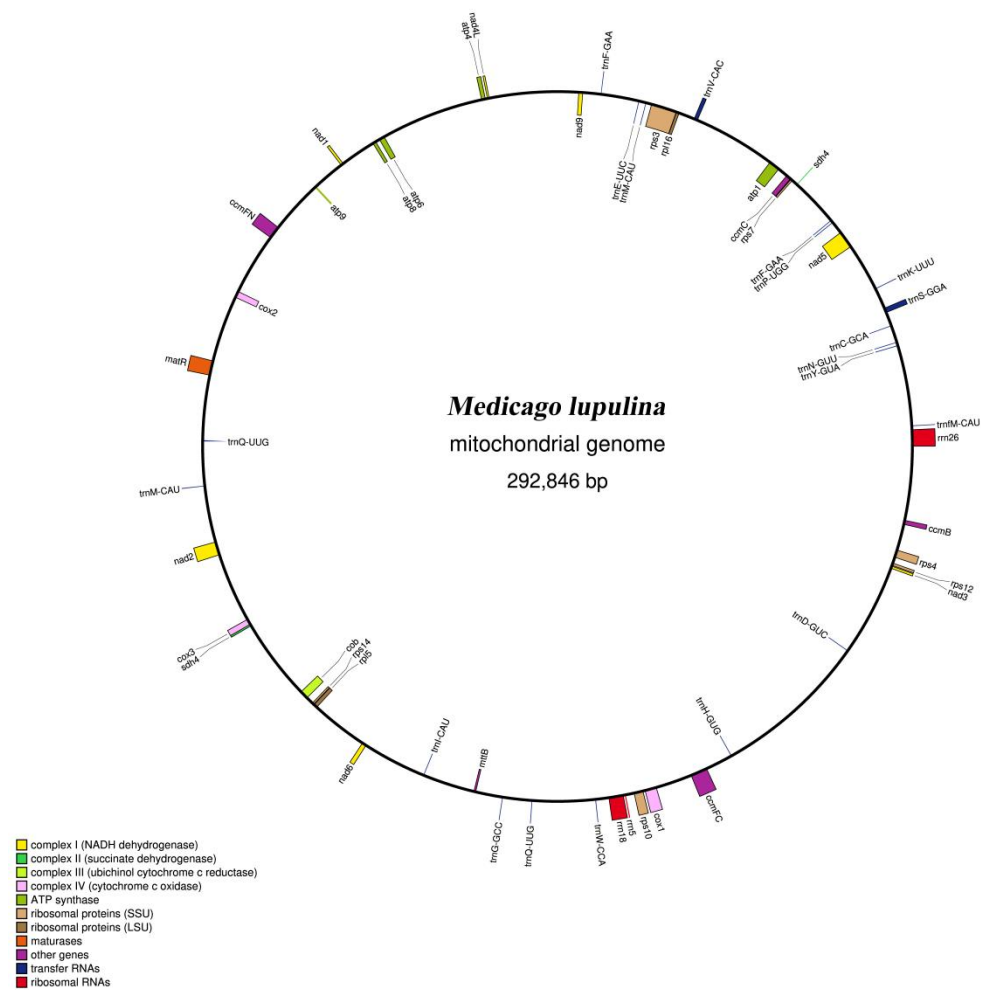

**Supplementary Figure 1. Circular map of the mitochondrial genome of *Medicago lupulina***

Genomic features are mapped on the inner and outer sides of the circular genome according to functional categories, with different colors used to distinguish gene functions.

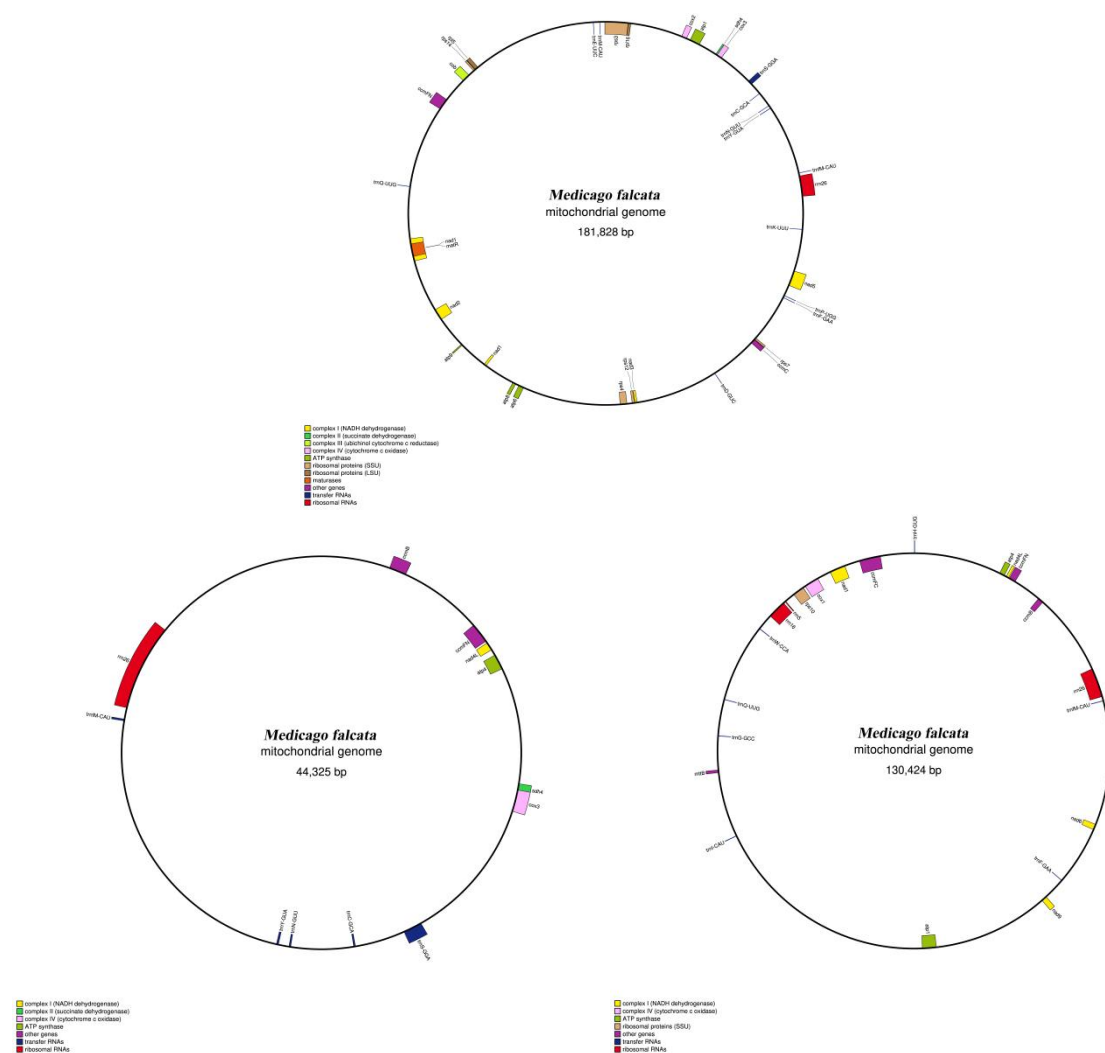

**Supplementary Figure 2. Circular map of the mitochondrial genome of *Medicago falcata***

Genomic features are mapped on the inner and outer sides of the circular genome according to functional categories, with different colors used to distinguish gene functions.



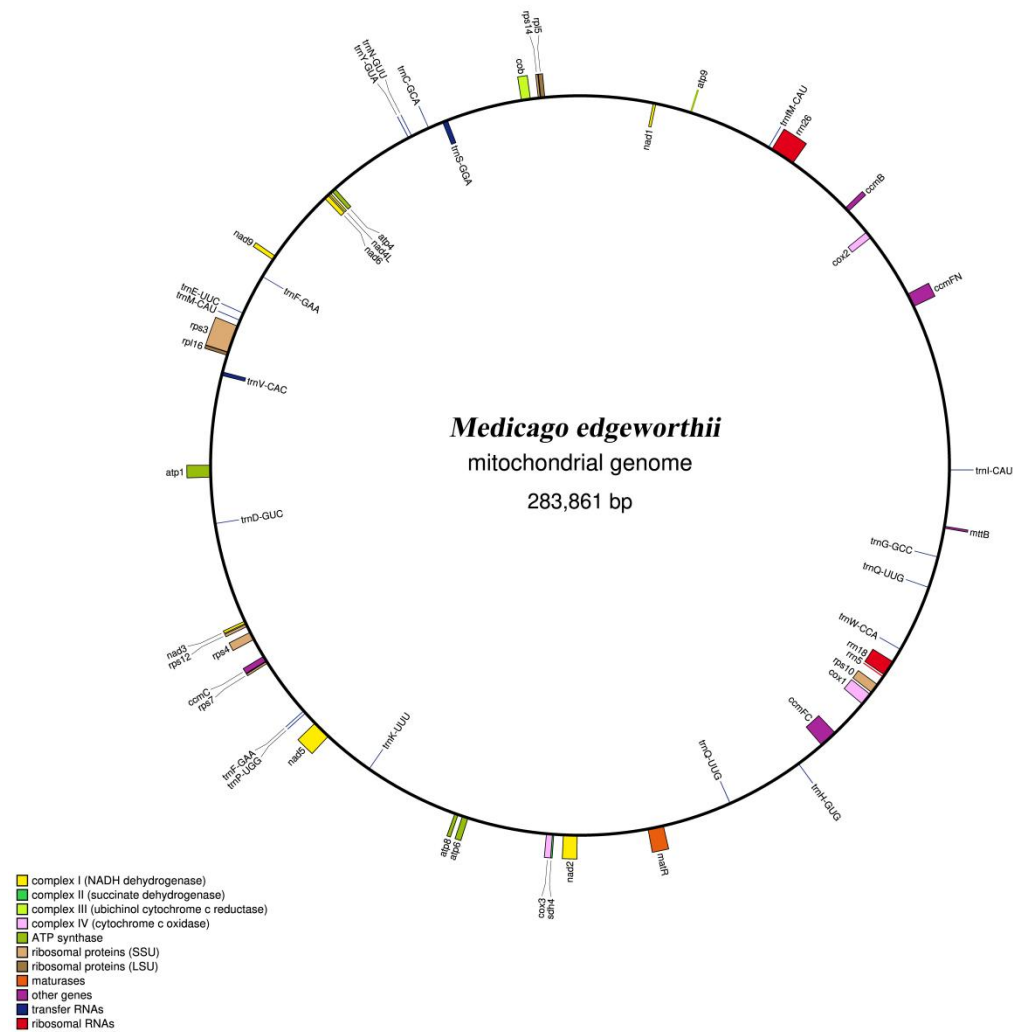

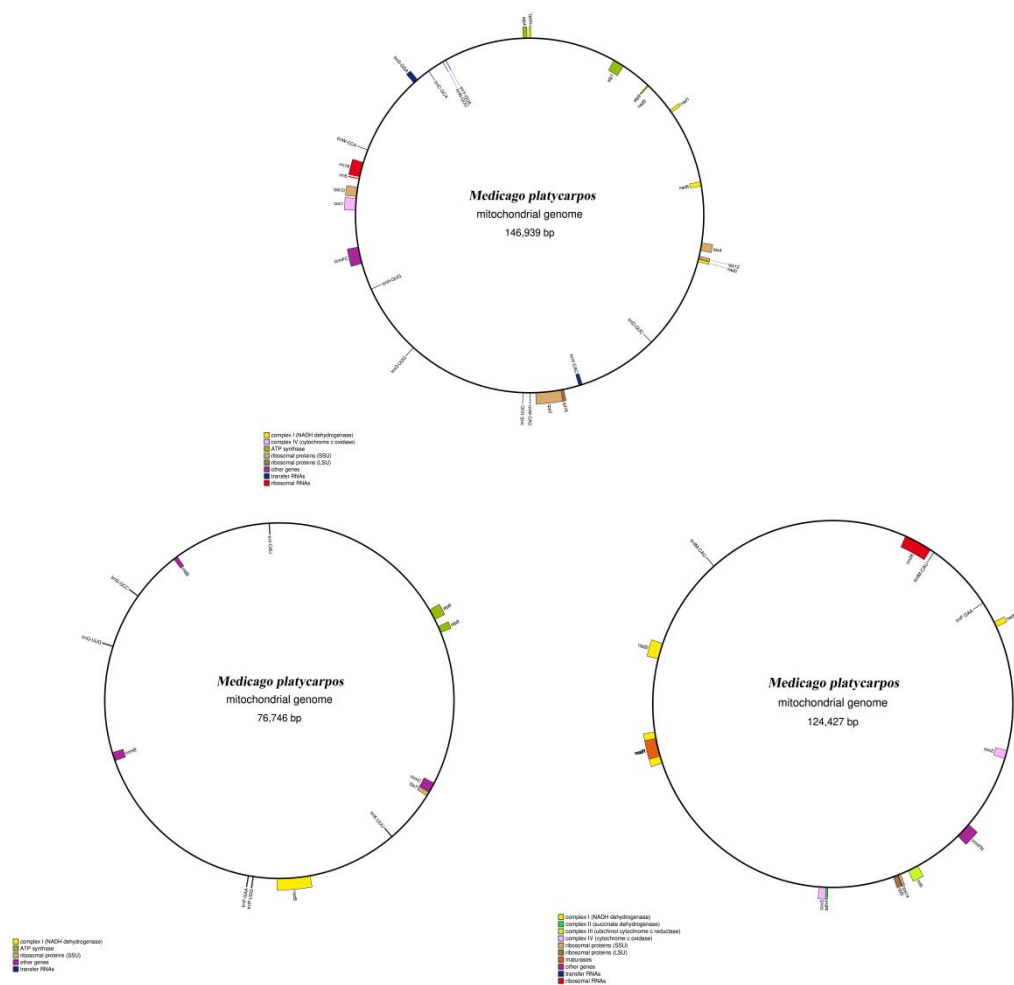

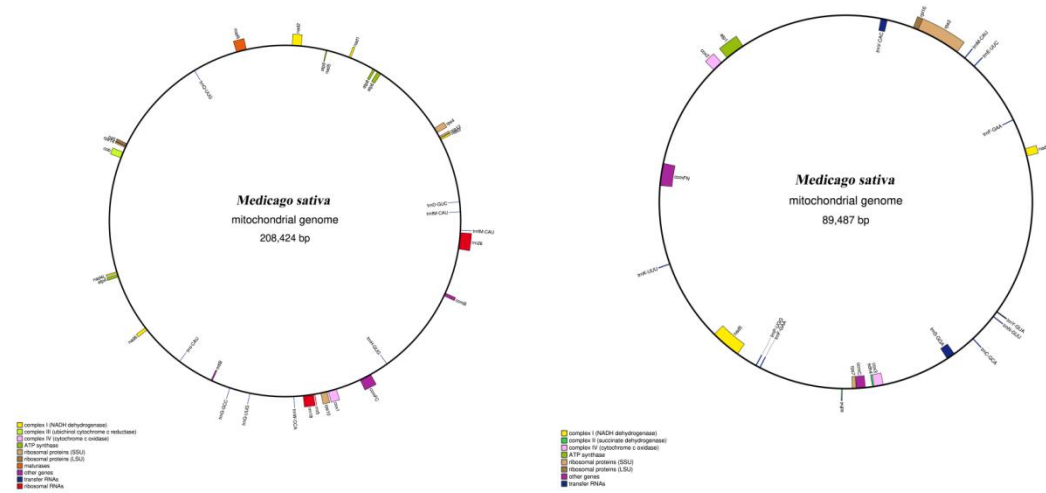

**Supplementary Figure 6. Circular map of the mitochondrial genome of *Medicago sativa***

Genomic features are mapped on the inner and outer sides of the circular genome according to functional categories, with different colors used to distinguish gene functions.

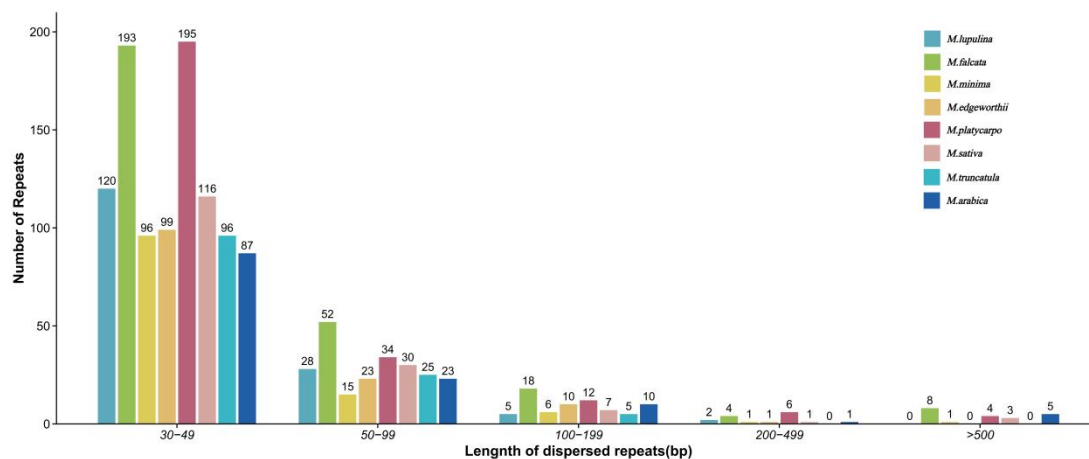

**Supplementary Figure 7. Length distribution of dispersed repeats in the mitochondrial genomes of *Medicago* species**

The figure shows the classification and abundance of dispersed repeats by length across different species. The x-axis represents repeat length intervals, the y-axis indicates the corresponding number of repeats, and different colors denote different species. Exact counts are labeled above each bar. Teal Blue: *M. lupulina*; Olive Green: *M. falcata*; Golden Yellow: *M. minima*; Honey Gold: *M. edgeworthii*; Rosewood: *M. platycarpos*; Rose Beige: *M. sativa*; Turquoise Blue: *M. truncatula*; Royal Blue: *M. arabica*.

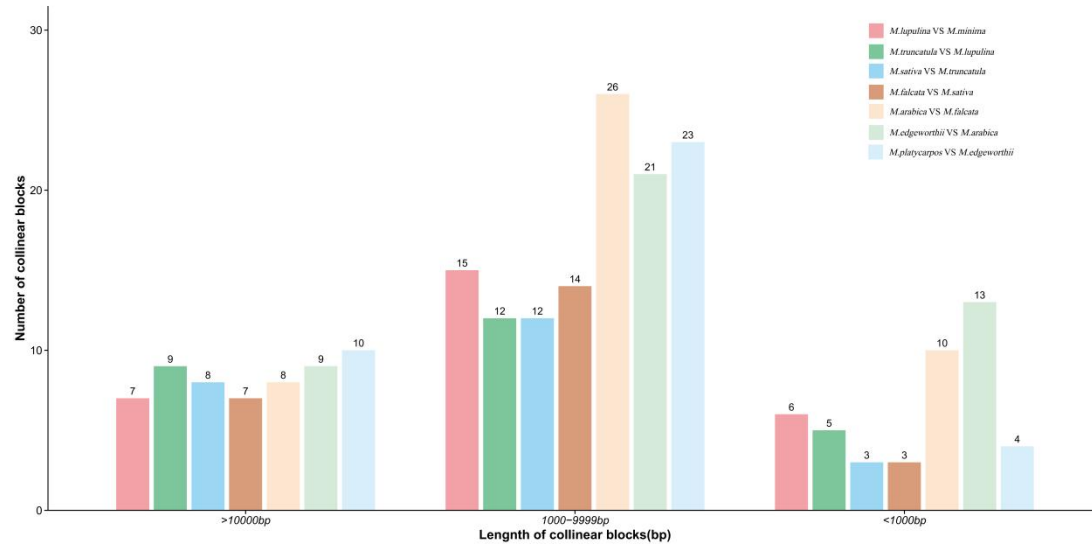

### Supplementary Figure 8. Statistics of the length and number of syntenic blocks

The figure displays the length distribution and quantity of syntenic blocks among *Medicago* species. Different colors represent homologous regions between specific species pairs. Soft Rose: *M. lupulina* VS *M. minima*; Mint Green: *M. truncatula* VS *M. lupulina*; Sky Blue: *M. sativa* VS *M. truncatula*; Warm Apricot: *M. falcata* VS *M. sativa*; Light Apricot: *M. arabica* VS *M. falcata*; Pastel Green: *M. edgeworthii* VS *M. arabica*; Pale Sky Blue: *M. platycarpus* VS *M. edgeworthii*.
